# Supplementary material
Source: PubMed Central journal article supplement (PMC1586066)
Supplement: NIHMS11966-supplement-SI-tables.pdf [file NIHMS11966-supplement-SI-tables.pdf]

## **Supporting Information for**

### Coordination of Diatomic Ligands to Heme: Simply CO

Nathan J. Silvernail, Bruce C. Noll, Charles E. Schulz, and W. Robert Scheidt\*

## Experimental Section

**General Information.** All reactions were carried out under anaerobic conditions using standard Schlenk techniques under an argon atmosphere. Free base [H<sub>2</sub>OEP] (Mid-Century Chemicals) and ethanethiol (Acros) were used as received. Carbon monoxide gas (Mittler Specialty Gases) was passed through a trap containing 4 Å molecular sieves to remove residual water. Benzene (Fisher) was purified by distillation in a nitrogen atmosphere over sodium/benzophenone ketyl. Methylene chloride (Fisher) was purified by distillation in a nitrogen atmosphere over calcium hydride. All solvents were freeze/pump/thaw degassed (3×) prior to use. [Fe(OEP)(Cl)] was prepared according to the metalation procedure of Adler et al.<sup>1</sup> [Fe(OEP)]<sub>2</sub>O was prepared by washing a solution of [Fe(OEP)Cl] in methylene chloride with 2 M aqueous sodium hydroxide solution (3×), drying the collected organic layers over magnesium sulfate followed by recrystallization from methylene chloride/hexanes.<sup>2</sup> [Fe(OEP)] was prepared by stirring a solution of [Fe(OEP)]<sub>2</sub>O and excess ethanethiol in benzene for 2 d.<sup>3</sup> After reduction, solvent and excess ethanethiol were removed under vacuum.

Infrared spectra were recorded on a Nicolet Nexus 870 FT-IR spectrometer. Solid state infrared samples were prepared by gently mulling a suitable crystal between two NaCl plates with a small amount of Nujol to allow dispersion. Samples were prepared for Mössbauer spectroscopy by weighing approximately 2 mg of selected crystals, grinding them in a small volume of Apiezon M grease to form a mull and placing them into a Mössbauer cup. Measurements were performed on a constant acceleration spectrometer from 4.2 K to 300 K.

**Synthesis of [Fe(OEP)(CO)] and [Fe(OEP)(CO)<sub>2</sub>].** A solution of 30 mg (0.49 mmol) [Fe(OEP)] in 7 mL benzene was purged with CO for 10 min while stirring, then heated slightly to dissolve all material. The solution was then cannula transferred into 8 mm glass tubes, carefully

layered with hexanes and the tubes were flame sealed. The tubes were stored at 4 °C for 30 d, after which X-ray quality crystals were isolated. Each crystallization tube yielded a single crystalline species, i.e. mixtures of crystal species were *not* found. The “plate-like” crystals of [Fe(OEP)(CO)] could be differentiated from the “block-like” crystals of [Fe(OEP)(CO)<sub>2</sub>] by visual inspection and by IR spectroscopy of crushed single crystals. IR  $\nu_{CO}$  in Nujol mull: Fe(OEP)(CO), 1944 cm<sup>-1</sup>; [Fe(OEP)(CO)<sub>2</sub>], 2021 cm<sup>-1</sup>.

**Synthesis of [Fe(OEP)(CO)]·C<sub>6</sub>H<sub>6</sub>.** A solution of 30 mg (0.49 mmol) [Fe(OEP)] in 10 mL benzene was purged with CO for 10 min while stirring, then heated slightly to dissolve all material. The solution was then cannula transferred into 8 mm glass tubes, carefully layered with hexanes and the tubes were flame sealed. The tubes were stored at 4 °C for 30 d, after which X-ray quality crystals were isolated. IR  $\nu_{CO}$  in Nujol mull: [Fe(OEP)(CO)]·C<sub>6</sub>H<sub>6</sub>, 1948 cm<sup>-1</sup>.

**X-Ray Crystallographic Studies.** The crystals were placed in inert oil, mounted on a glass pin, and transferred to the cold gas stream of the diffractometer. Crystal data were collected and integrated using a Bruker Apex system, with graphite monochromated Mo-K $\alpha$  ( $\lambda = 0.71073$  Å) radiation at 100 K (700 Series Oxford Cryostream) for all complexes. Data was collected to a  $2\theta_{max} \geq 62^\circ$ . The program SADABS<sup>4</sup> was applied for absorption correction.

All structures were solved by direct methods in SHELXS-97<sup>5</sup> and refined using SHELXL-97.<sup>6</sup> All atoms were found after successive full-matrix least-squares refinement cycles on  $F^2$  and refined with anisotropic thermal parameters. Hydrogen atom positions were idealized with a riding model and fixed thermal parameters [ $U_{ij} = 1.2U_{ij}(eq)$  or  $1.5U_{ij}(eq)$ ] for the atom to which they are bonded. Complete crystallographic details are given below.

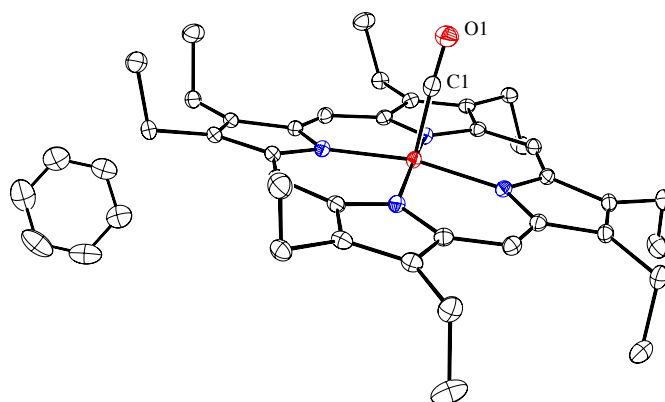

**Figure S1.** Thermal ellipsoid plot of  $[\text{Fe}(\text{OEP})(\text{CO})]\cdot\text{C}_6\text{H}_6$ .

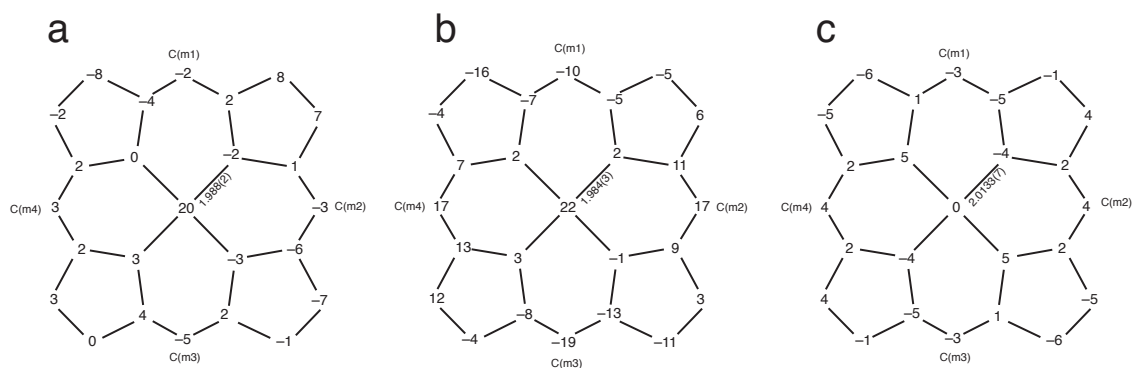

**Figure S2.** Formal diagrams of the porphyrinato core of  $[\text{Fe}(\text{OEP})(\text{CO})]$  (a),  $[\text{Fe}(\text{OEP})(\text{CO})]\cdot\text{C}_6\text{H}_6$  (b), and  $[\text{Fe}(\text{OEP})(\text{CO})_2]$  (c) displaying the perpendicular displacements (in units of  $0.01 \text{ \AA}$ ) of the core atoms from the 24-atom mean plane. Positive displacements are toward the CO-coordinated face.

**Table S1.** Mössbauer data for [Fe(OEP)(CO)] and related complexes.

| Complex <sup>a</sup>                                                     | Temp, K | $\Delta E_Q^b$ | $\delta^b$ | ref |
|--------------------------------------------------------------------------|---------|----------------|------------|-----|
| [Fe(OEP)(CO)]                                                            | 298     | 1.81           | 0.14       | tw  |
|                                                                          | 250     | 1.83           | 0.20       | tw  |
|                                                                          | 225     | 1.84           | 0.20       | tw  |
|                                                                          | 100     | 1.84           | 0.23       | tw  |
|                                                                          | 25      | 1.84           | 0.23       | tw  |
|                                                                          | 4.2     | 1.84           | 0.27       | tw  |
| [Fe(OEP)(CO) <sub>2</sub> ]                                              | 298     | 0.18           | 0.18       | tw  |
|                                                                          | 200     | 0.11           | 0.27       | tw  |
|                                                                          | 100     | 0.10           | 0.28       | tw  |
|                                                                          | 15      | 0.097          | 0.28       | tw  |
|                                                                          | 4.2     | 0              | 0.31       | tw  |
| [Fe(OEP)(CS)]                                                            | 293     | 1.95           | -0.03      | 10  |
|                                                                          | 4.2     | 1.93           | 0.08       | 10  |
| [Fe(OEP)(NO)]                                                            | 100     | 1.26           | 0.35       | 13  |
| [Fe(TPP)(NO)]                                                            | 4.2     | 1.24           | 0.35       | 12  |
| [Fe(OEP)(CO)(1-MeIm)]-<br>·C <sub>6</sub> H <sub>6</sub>                 | 293     | 0.40           | 0.18       | 7   |
|                                                                          | 200     | 0.37           | 0.25       | 7   |
|                                                                          | 100     | 0.37           | 0.23       | 7   |
| [Fe(TPP)(CO)(1,2-Me <sub>2</sub> Im)]-<br>·C <sub>7</sub> H <sub>8</sub> | 15      | 0.34           | 0.24       | 7   |
|                                                                          | 293     | 0.71           | 0.17       | 7   |
|                                                                          | 200     | 0.65           | 0.23       | 7   |
| [Fe(TPP)(CO)(1-MeIm)]<br>·C <sub>6</sub> H <sub>6</sub>                  | 100     | 0.66           | 0.29       | 7   |
|                                                                          | 15      | 0.64           | 0.25       | 7   |
|                                                                          | 293     | 0.35           | 0.16       | 7   |
| [Fe(TPP)(CO)(1-MeIm)]<br>·C <sub>6</sub> H <sub>6</sub>                  | 200     | 0.32           | 0.24       | 7   |
|                                                                          | 100     | 0.32           | 0.25       | 7   |
|                                                                          | 15      | 0.30           | 0.26       | 7   |
| [Fe(TPP)(NO)(1-MeIm)]                                                    | 293     | 0.80           | 0.24       | 9   |
|                                                                          | 4.2     | 0.73           | 0.35       | 9   |
| [Fe(OEP)(CS)(1-MeIm)]                                                    | 293     | 0.47           | 0.03       | 10  |
|                                                                          | 4.2     | 0.42           | 0.14       | 10  |

<sup>a</sup>Abbreviations given in the References. <sup>b</sup> Value in mm/sec.

## References and Notes

- (1) Adler, A. D.; Longo, F. R.; Kampus, F.; Kim, J. *J. Inorg. Nucl. Chem.* **1970**, *32*, 2443.
- (2) (a) Fleischer, E. B.; Srivastava, T. S. *J. Am. Chem. Soc.* **1969**, *91*, 2403. (b) Hoffman, A. B.; Collins, D. M.; Day, V. W.; Fleischer, E. B.; Srivastava, T. S.; Hoard, J. L. *J. Am. Chem. Soc.* **1972**, *94*, 3620.
- (3) Stolzenberg, A. M.; Strauss, S. H.; Holm, R. H. *J. Am. Chem. Soc.* **1981**, *103*, 4763.
- (4) Sheldrick, G. M.: Program for empirical absorption correction of area detector data. Universität Göttingen, Germany, 1996.
- (5) Sheldrick, G. M. *Acta Crystallogr.* **1990**, *A46*, 467.
- (6) SHELXL-97: FORTRAN program for crystal structure refinement, © 1997, Sheldrick, G. M., Universität Göttingen, Germany.
- (7) Silvernail, N. J.; Roth, A.; Schulz, C. E.; Noll, B. C.; Scheidt, W. R. *J. Am. Chem. Soc.* **2005**, *127*, 14422.
- (8) Kim, K.; Ibers, J. A. *J. Am. Chem. Soc.* **1991**, *113*, 6077.
- (9) Wyllie, G. R. A.; Schulz, C. E.; Scheidt, W. R. *Inorg. Chem.* **2003**, *42*, 5722.
- (10) Cao, C.; Dahal, S.; Shang, M.; Beatty, A. M.; Hibbs, W.; Schulz, C. E.; Scheidt, W. R. *Inorg. Chem.* **2003**, *42*, 5202.
- (11) (a) Chu, G. C.; Katakura, K.; Tomita, T.; Zhang, X.; Sun, D.; Sato, M.; Sasahara, M.; Kayama, T.; Ikeda-Saito, M.; Yoshida, T. *J. Biol. Chem.* **2000**, *275*, 17494. (b) Vogel, K. M.; Spiro, T. G.; Shelver, D.; Thorsteinsson, M. V.; Roberts, G. P. *Biochemistry* **1999**, *38*, 2679.
- (12) Nasri, H.; Ellison, M. K.; Chen, S.; Hunyh, B. H.; Scheidt, W. R. *J. Am. Chem. Soc.* **1997**, *119*, 6274.
- (13) Bohle, D. S.; Debrunner, P. G.; Fitzgerald, J.; Hansert, B.; Hung, C.-H.; Thompson, A. *J. J. Chem. Soc., Chem. Commun.* **1997**, 91.

## Supporting Information

**Table S2.** Complete Crystallographic Details for [Fe(OEP)(CO)]

|                                                              |                                                                   |
|--------------------------------------------------------------|-------------------------------------------------------------------|
| formula                                                      | C <sub>37</sub> H <sub>44</sub> FeN <sub>4</sub> O                |
| FW, amu                                                      | 616.61                                                            |
| <i>a</i> , Å                                                 | 10.440(2)                                                         |
| <i>b</i> , Å                                                 | 10.540(2)                                                         |
| <i>c</i> , Å                                                 | 15.470(3)                                                         |
| $\alpha$ , deg                                               | 109.85(3)                                                         |
| $\beta$ , deg                                                | 100.43(3)                                                         |
| $\gamma$ , deg                                               | 98.65(3)                                                          |
| <i>V</i> , Å <sup>3</sup>                                    | 1532.8(5)                                                         |
| space group                                                  | <i>P</i> $\bar{1}$                                                |
| <i>Z</i>                                                     | 2                                                                 |
| D <sub>c</sub> , g/cm <sup>3</sup>                           | 1.336                                                             |
| F(000)                                                       | 656                                                               |
| $\mu$ , mm <sup>-1</sup>                                     | 0.529                                                             |
| crystal dimensions, mm                                       | 0.25 × 0.24 × 0.11                                                |
| radiation                                                    | MoK $\alpha$ , $\bar{\lambda}$ = 0.71073 Å                        |
| temperature, K                                               | 100(2)                                                            |
| diffractometer                                               | Bruker Apex CCD                                                   |
| $\theta$ range for collected data, deg                       | 1.45–31.55                                                        |
| index range                                                  | –15 ≤ <i>h</i> ≤ 15<br>–15 ≤ <i>k</i> ≤ 13<br>–22 ≤ <i>l</i> ≤ 22 |
| total data collected                                         | 36545                                                             |
| absorption correction                                        | Semi-empirical from equiv                                         |
| relative transmission coefficients (I)                       | 0.9431 and 0.8791                                                 |
| unique data                                                  | 10168 ( <i>R</i> <sub>int</sub> = 0.015)                          |
| unique observed data [ <i>I</i> > 2 $\sigma$ ( <i>I</i> )]   | 9496                                                              |
| refinement method                                            | Full-matrix least-squares on <i>F</i> <sup>2</sup>                |
| data/restraints/parameters                                   | 10168/0/397                                                       |
| goodness-of-fit (pased on <i>F</i> <sup>2</sup> )            | 1.038                                                             |
| final <i>R</i> indices [ <i>I</i> > 2 $\sigma$ ( <i>I</i> )] | <i>R</i> <sub>1</sub> = 0.0285, <i>wR</i> <sub>2</sub> = 0.0795   |
| final <i>R</i> indices (all data)                            | <i>R</i> <sub>1</sub> = 0.0308, <i>wR</i> <sub>2</sub> = 0.0815   |

**Table S3.** Atomic Coordinates and Equivalent Isotropic Displacement Parameters ( $\text{\AA}^2$ ) for  $[\text{Fe}(\text{OEP})(\text{CO})]^a$

| atom  | <i>x</i>     | <i>y</i>     | <i>z</i>   | <i>U</i> (eq) |
|-------|--------------|--------------|------------|---------------|
| Fe(1) | 0.43597(1)   | 0.22769(1)   | 0.25283(1) | 0.0108(1)     |
| N(1)  | 0.29522(7)   | 0.18971(7)   | 0.31725(5) | 0.0120(1)     |
| N(2)  | 0.42308(7)   | 0.02540(7)   | 0.19303(5) | 0.0122(1)     |
| N(3)  | 0.60277(7)   | 0.26352(7)   | 0.21148(5) | 0.0125(1)     |
| N(4)  | 0.47254(7)   | 0.42812(7)   | 0.33355(5) | 0.0125(1)     |
| C(m1) | 0.23150(8)   | −0.06333(9)  | 0.24273(6) | 0.0134(1)     |
| C(m2) | 0.60401(9)   | 0.02675(9)   | 0.11245(6) | 0.0140(2)     |
| C(m3) | 0.66299(9)   | 0.51668(9)   | 0.28240(6) | 0.0143(2)     |
| C(m4) | 0.29223(9)   | 0.42660(9)   | 0.41445(6) | 0.0142(2)     |
| C(a1) | 0.24297(8)   | 0.28480(9)   | 0.37850(6) | 0.0129(1)     |
| C(a2) | 0.21825(8)   | 0.06256(9)   | 0.30287(6) | 0.0124(1)     |
| C(a3) | 0.32507(8)   | −0.08092(9)  | 0.18984(6) | 0.0124(1)     |
| C(a4) | 0.49467(8)   | −0.03976(9)  | 0.13148(6) | 0.0126(1)     |
| C(a5) | 0.65554(8)   | 0.16801(9)   | 0.15062(6) | 0.0129(1)     |
| C(a6) | 0.68012(8)   | 0.39056(9)   | 0.22564(6) | 0.0132(1)     |
| C(a7) | 0.56787(9)   | 0.53465(9)   | 0.33418(6) | 0.0133(1)     |
| C(a8) | 0.40044(9)   | 0.49358(9)   | 0.39469(6) | 0.0132(1)     |
| C(b1) | 0.13317(9)   | 0.21643(9)   | 0.40350(6) | 0.0138(1)     |
| C(b2) | 0.11883(9)   | 0.07773(9)   | 0.35716(6) | 0.0133(1)     |
| C(b3) | 0.33481(8)   | −0.21339(9)  | 0.12532(6) | 0.0129(1)     |
| C(b4) | 0.44114(8)   | −0.18771(9)  | 0.08916(6) | 0.0130(1)     |
| C(b5) | 0.76899(8)   | 0.23551(9)   | 0.12827(6) | 0.0138(1)     |
| C(b6) | 0.78324(8)   | 0.37433(9)   | 0.17425(6) | 0.0137(1)     |
| C(b7) | 0.55680(9)   | 0.66772(9)   | 0.39753(6) | 0.0138(1)     |
| C(b8) | 0.45324(9)   | 0.64191(9)   | 0.43592(6) | 0.0139(1)     |
| C(10) | 0.05103(10)  | 0.28737(10)  | 0.46633(7) | 0.0182(2)     |
| C(11) | −0.06697(12) | 0.32169(13)  | 0.41109(9) | 0.0282(2)     |
| C(20) | 0.02232(9)   | −0.03943(9)  | 0.36102(7) | 0.0168(2)     |
| C(21) | −0.09603(10) | −0.10757(11) | 0.27361(8) | 0.0216(2)     |
| C(30) | 0.24474(9)   | −0.35021(9)  | 0.10492(6) | 0.0155(2)     |
| C(31) | 0.29494(11)  | −0.42216(10) | 0.17090(8) | 0.0221(2)     |
| C(40) | 0.49676(9)   | −0.28863(9)  | 0.02041(6) | 0.0151(2)     |
| C(41) | 0.62321(10)  | −0.32034(10) | 0.06798(7) | 0.0202(2)     |
| C(50) | 0.85416(9)   | 0.16196(10)  | 0.06909(7) | 0.0164(2)     |



**Table S3.** Continued

| atom  | $x$         | $y$         | $z$        | $U(\text{eq})$ |
|-------|-------------|-------------|------------|----------------|
| C(51) | 0.95309(12) | 0.10642(14) | 0.12399(9) | 0.0289(2)      |
| C(60) | 0.88367(9)  | 0.49110(9)  | 0.17341(7) | 0.0162(2)      |
| C(61) | 0.99863(10) | 0.55624(11) | 0.26295(7) | 0.0210(2)      |
| C(70) | 0.64223(9)  | 0.80550(9)  | 0.41388(6) | 0.0161(2)      |
| C(71) | 0.58834(10) | 0.86569(10) | 0.34128(7) | 0.0205(2)      |
| C(80) | 0.40053(9)  | 0.74440(9)  | 0.50632(6) | 0.0162(2)      |
| C(81) | 0.28397(10) | 0.78986(10) | 0.45879(7) | 0.0205(2)      |
| C(1)  | 0.32679(9)  | 0.22802(9)  | 0.15579(6) | 0.0148(2)      |
| O(1)  | 0.25272(8)  | 0.22244(8)  | 0.08940(5) | 0.0227(1)      |

<sup>a</sup> $U(\text{eq})$  is defined as one third of the trace of the orthogonalized  $\mathbf{U}_{ij}$  tensor. The estimated standard deviations of the least significant digits are given in parentheses.

**Table S4.** Bond Lengths for [Fe(OEP)(CO)]<sup>a</sup>

| bond        | length (Å) | bond         | length (Å) |
|-------------|------------|--------------|------------|
| Fe(1)–C(1)  | 1.7140(11) | C(11)–H(11a) | 0.9800     |
| Fe(1)–N(1)  | 1.9843(9)  | C(11)–H(11b) | 0.9800     |
| Fe(1)–N(2)  | 1.9872(10) | C(11)–H(11C) | 0.9800     |
| Fe(1)–N(3)  | 1.9884(9)  | C(20)–C(21)  | 1.5296(16) |
| Fe(1)–N(4)  | 1.9902(11) | C(20)–H(20a) | 0.9900     |
| N(1)–C(a2)  | 1.3784(12) | C(20)–H(20b) | 0.9900     |
| N(1)–C(a1)  | 1.3808(12) | C(21)–H(21a) | 0.9800     |
| N(2)–C(a3)  | 1.3800(12) | C(21)–H(21b) | 0.9800     |
| N(2)–C(a4)  | 1.3802(11) | C(21)–H(21C) | 0.9800     |
| N(3)–C(a6)  | 1.3801(12) | C(30)–C(31)  | 1.5307(14) |
| N(3)–C(a5)  | 1.3836(12) | C(30)–H(30a) | 0.9900     |
| N(4)–C(a7)  | 1.3799(12) | C(30)–H(30b) | 0.9900     |
| N(4)–C(a8)  | 1.3814(12) | C(31)–H(31a) | 0.9800     |
| C(m1)–C(a3) | 1.3780(12) | C(31)–H(31b) | 0.9800     |
| C(m1)–C(a2) | 1.3816(13) | C(31)–H(31C) | 0.9800     |
| C(m1)–H(ma) | 0.9500     | C(40)–C(41)  | 1.5310(14) |
| C(m2)–C(a5) | 1.3791(13) | C(40)–H(40a) | 0.9900     |
| C(m2)–C(a4) | 1.3792(12) | C(40)–H(40b) | 0.9900     |
| C(m2)–H(mb) | 0.9500     | C(41)–H(41a) | 0.9800     |
| C(m3)–C(a7) | 1.3804(13) | C(41)–H(41b) | 0.9800     |
| C(m3)–C(a6) | 1.3804(13) | C(41)–H(41C) | 0.9800     |
| C(m3)–H(mC) | 0.9500     | C(50)–C(51)  | 1.5273(15) |
| C(m4)–C(a8) | 1.3783(13) | C(50)–H(50a) | 0.9900     |
| C(m4)–C(a1) | 1.3815(13) | C(50)–H(50b) | 0.9900     |
| C(m4)–H(md) | 0.9500     | C(51)–H(51a) | 0.9800     |
| C(a1)–C(b1) | 1.4437(12) | C(51)–H(51b) | 0.9800     |
| C(a2)–C(b2) | 1.4431(12) | C(51)–H(51C) | 0.9800     |
| C(a3)–C(b3) | 1.4454(13) | C(60)–C(61)  | 1.5280(15) |
| C(a4)–C(b4) | 1.4439(13) | C(60)–H(60a) | 0.9900     |
| C(a5)–C(b5) | 1.4459(12) | C(60)–H(60b) | 0.9900     |
| C(a6)–C(b6) | 1.4467(12) | C(61)–H(61a) | 0.9800     |
| C(a7)–C(b7) | 1.4482(13) | C(61)–H(61b) | 0.9800     |
| C(a8)–C(b8) | 1.4461(13) | C(61)–H(61C) | 0.9800     |
| C(b1)–C(b2) | 1.3628(13) | C(70)–C(71)  | 1.5306(14) |

**Table S4.** Continued

| bond         | length (Å) | bond         | length (Å) |
|--------------|------------|--------------|------------|
| C(b1)–C(10)  | 1.4967(13) | C(70)–H(70a) | 0.9900     |
| C(b2)–C(20)  | 1.4971(13) | C(70)–H(70b) | 0.9900     |
| C(b3)–C(b4)  | 1.3623(12) | C(71)–H(71a) | 0.9800     |
| C(b3)–C(30)  | 1.4963(13) | C(71)–H(71b) | 0.9800     |
| C(b4)–C(40)  | 1.4969(13) | C(71)–H(71C) | 0.9800     |
| C(b5)–C(b6)  | 1.3632(13) | C(80)–C(81)  | 1.5303(14) |
| C(b5)–C(50)  | 1.5000(13) | C(80)–H(80a) | 0.9900     |
| C(b6)–C(60)  | 1.4973(13) | C(80)–H(80b) | 0.9900     |
| C(b7)–C(b8)  | 1.3599(13) | C(81)–H(81a) | 0.9800     |
| C(b7)–C(70)  | 1.4992(13) | C(81)–H(81b) | 0.9800     |
| C(b8)–C(80)  | 1.5009(13) | C(81)–H(81C) | 0.9800     |
| C(10)–C(11)  | 1.5302(16) | C(1)–O(1)    | 1.1463(12) |
| C(10)–H(10a) | 0.9900     |              |            |
| C(10)–H(10b) | 0.9900     |              |            |

<sup>a</sup>The estimated standard deviations of the least significant digits are given in parentheses.

**Table S5.** Bond Angles for [Fe(OEP)(CO)]<sup>a</sup>

| angle             | degree    | angle               | degree    |
|-------------------|-----------|---------------------|-----------|
| C(1)–Fe(1)–N(1)   | 94.88(4)  | H(11a)–C(11)–H(11b) | 109.5     |
| C(1)–Fe(1)–N(2)   | 92.42(5)  | C(10)–C(11)–H(11C)  | 109.5     |
| N(1)–Fe(1)–N(2)   | 89.65(4)  | H(11a)–C(11)–H(11C) | 109.5     |
| C(1)–Fe(1)–N(3)   | 97.16(4)  | H(11b)–C(11)–H(11C) | 109.5     |
| N(1)–Fe(1)–N(3)   | 167.94(3) | C(b2)–C(20)–C(21)   | 113.88(8) |
| N(2)–Fe(1)–N(3)   | 89.28(4)  | C(b2)–C(20)–H(20a)  | 108.8     |
| C(1)–Fe(1)–N(4)   | 98.49(5)  | C(21)–C(20)–H(20a)  | 108.8     |
| N(1)–Fe(1)–N(4)   | 89.34(4)  | C(b2)–C(20)–H(20b)  | 108.8     |
| N(2)–Fe(1)–N(4)   | 169.09(3) | C(21)–C(20)–H(20b)  | 108.8     |
| N(3)–Fe(1)–N(4)   | 89.44(4)  | H(20a)–C(20)–H(20b) | 107.7     |
| C(a2)–N(1)–C(a1)  | 104.66(7) | C(20)–C(21)–H(21a)  | 109.5     |
| C(a2)–N(1)–Fe(1)  | 127.37(6) | C(20)–C(21)–H(21b)  | 109.5     |
| C(a1)–N(1)–Fe(1)  | 127.64(6) | H(21a)–C(21)–H(21b) | 109.5     |
| C(a3)–N(2)–C(a4)  | 104.33(7) | C(20)–C(21)–H(21C)  | 109.5     |
| C(a3)–N(2)–Fe(1)  | 127.29(6) | H(21a)–C(21)–H(21C) | 109.5     |
| C(a4)–N(2)–Fe(1)  | 127.44(6) | H(21b)–C(21)–H(21C) | 109.5     |
| C(a6)–N(3)–C(a5)  | 104.53(7) | C(b3)–C(30)–C(31)   | 113.34(8) |
| C(a6)–N(3)–Fe(1)  | 127.29(6) | C(b3)–C(30)–H(30a)  | 108.9     |
| C(a5)–N(3)–Fe(1)  | 127.54(6) | C(31)–C(30)–H(30a)  | 108.9     |
| C(a7)–N(4)–C(a8)  | 104.38(7) | C(b3)–C(30)–H(30b)  | 108.9     |
| C(a7)–N(4)–Fe(1)  | 127.58(6) | C(31)–C(30)–H(30b)  | 108.9     |
| C(a8)–N(4)–Fe(1)  | 127.79(6) | H(30a)–C(30)–H(30b) | 107.7     |
| C(a3)–C(m1)–C(a2) | 125.26(8) | C(30)–C(31)–H(31a)  | 109.5     |
| C(a3)–C(m1)–H(ma) | 117.4     | C(30)–C(31)–H(31b)  | 109.5     |
| C(a2)–C(m1)–H(ma) | 117.4     | H(31a)–C(31)–H(31b) | 109.5     |
| C(a5)–C(m2)–C(a4) | 124.84(8) | C(30)–C(31)–H(31C)  | 109.5     |
| C(a5)–C(m2)–H(mb) | 117.6     | H(31a)–C(31)–H(31C) | 109.5     |
| C(a4)–C(m2)–H(mb) | 117.6     | H(31b)–C(31)–H(31C) | 109.5     |
| C(a7)–C(m3)–C(a6) | 125.34(8) | C(b4)–C(40)–C(41)   | 113.17(8) |
| C(a7)–C(m3)–H(mC) | 117.3     | C(b4)–C(40)–H(40a)  | 108.9     |
| C(a6)–C(m3)–H(mC) | 117.3     | C(41)–C(40)–H(40a)  | 108.9     |
| C(a8)–C(m4)–C(a1) | 125.08(8) | C(b4)–C(40)–H(40b)  | 108.9     |
| C(a8)–C(m4)–H(md) | 117.5     | C(41)–C(40)–H(40b)  | 108.9     |
| C(a1)–C(m4)–H(md) | 117.5     | H(40a)–C(40)–H(40b) | 107.8     |

**Table S5.** Continued

| angle             | degree    | angle               | degree    |
|-------------------|-----------|---------------------|-----------|
| N(1)–C(a1)–C(m4)  | 124.70(8) | C(40)–C(41)–H(41a)  | 109.5     |
| N(1)–C(a1)–C(b1)  | 111.12(8) | C(40)–C(41)–H(41b)  | 109.5     |
| C(m4)–C(a1)–C(b1) | 124.13(8) | H(41a)–C(41)–H(41b) | 109.5     |
| N(1)–C(a2)–C(m1)  | 124.85(8) | C(40)–C(41)–H(41C)  | 109.5     |
| N(1)–C(a2)–C(b2)  | 111.14(8) | H(41a)–C(41)–H(41C) | 109.5     |
| C(m1)–C(a2)–C(b2) | 123.99(8) | H(41b)–C(41)–H(41C) | 109.5     |
| C(m1)–C(a3)–N(2)  | 124.34(8) | C(b5)–C(50)–C(51)   | 112.31(8) |
| C(m1)–C(a3)–C(b3) | 124.34(8) | C(b5)–C(50)–H(50a)  | 109.1     |
| N(2)–C(a3)–C(b3)  | 111.31(8) | C(51)–C(50)–H(50a)  | 109.1     |
| C(m2)–C(a4)–N(2)  | 124.78(8) | C(b5)–C(50)–H(50b)  | 109.1     |
| C(m2)–C(a4)–C(b4) | 123.75(8) | C(51)–C(50)–H(50b)  | 109.1     |
| N(2)–C(a4)–C(b4)  | 111.47(8) | H(50a)–C(50)–H(50b) | 107.9     |
| C(m2)–C(a5)–N(3)  | 124.83(8) | C(50)–C(51)–H(51a)  | 109.5     |
| C(m2)–C(a5)–C(b5) | 123.78(8) | C(50)–C(51)–H(51b)  | 109.5     |
| N(3)–C(a5)–C(b5)  | 111.34(8) | H(51a)–C(51)–H(51b) | 109.5     |
| N(3)–C(a6)–C(m3)  | 124.64(8) | C(50)–C(51)–H(51C)  | 109.5     |
| N(3)–C(a6)–C(b6)  | 111.07(8) | H(51a)–C(51)–H(51C) | 109.5     |
| C(m3)–C(a6)–C(b6) | 124.28(8) | H(51b)–C(51)–H(51C) | 109.5     |
| N(4)–C(a7)–C(m3)  | 124.43(8) | C(b6)–C(60)–C(61)   | 113.69(8) |
| N(4)–C(a7)–C(b7)  | 111.25(8) | C(b6)–C(60)–H(60a)  | 108.8     |
| C(m3)–C(a7)–C(b7) | 124.31(8) | C(61)–C(60)–H(60a)  | 108.8     |
| C(m4)–C(a8)–N(4)  | 124.56(8) | C(b6)–C(60)–H(60b)  | 108.8     |
| C(m4)–C(a8)–C(b8) | 124.07(8) | C(61)–C(60)–H(60b)  | 108.8     |
| N(4)–C(a8)–C(b8)  | 111.37(8) | H(60a)–C(60)–H(60b) | 107.7     |
| C(b2)–C(b1)–C(a1) | 106.47(8) | C(60)–C(61)–H(61a)  | 109.5     |
| C(b2)–C(b1)–C(10) | 127.93(8) | C(60)–C(61)–H(61b)  | 109.5     |
| C(a1)–C(b1)–C(10) | 125.59(8) | H(61a)–C(61)–H(61b) | 109.5     |
| C(b1)–C(b2)–C(a2) | 106.58(8) | C(60)–C(61)–H(61C)  | 109.5     |
| C(b1)–C(b2)–C(20) | 128.27(8) | H(61a)–C(61)–H(61C) | 109.5     |
| C(a2)–C(b2)–C(20) | 125.13(8) | H(61b)–C(61)–H(61C) | 109.5     |
| C(b4)–C(b3)–C(a3) | 106.51(8) | C(b7)–C(70)–C(71)   | 112.54(8) |
| C(b4)–C(b3)–C(30) | 128.01(8) | C(b7)–C(70)–H(70a)  | 109.1     |
| C(a3)–C(b3)–C(30) | 125.47(8) | C(71)–C(70)–H(70a)  | 109.1     |
| C(b3)–C(b4)–C(a4) | 106.37(8) | C(b7)–C(70)–H(70b)  | 109.1     |

**Table S5.** Continued

| angle               | degree    | angle               | degree    |
|---------------------|-----------|---------------------|-----------|
| C(b3)–C(b4)–C(40)   | 128.66(8) | C(71)–C(70)–H(70b)  | 109.1     |
| C(a4)–C(b4)–C(40)   | 124.97(8) | H(70a)–C(70)–H(70b) | 107.8     |
| C(b6)–C(b5)–C(a5)   | 106.24(8) | C(70)–C(71)–H(71a)  | 109.5     |
| C(b6)–C(b5)–C(50)   | 128.73(8) | C(70)–C(71)–H(71b)  | 109.5     |
| C(a5)–C(b5)–C(50)   | 124.98(8) | H(71a)–C(71)–H(71b) | 109.5     |
| C(b5)–C(b6)–C(a6)   | 106.79(8) | C(70)–C(71)–H(71C)  | 109.5     |
| C(b5)–C(b6)–C(60)   | 128.25(8) | H(71a)–C(71)–H(71C) | 109.5     |
| C(a6)–C(b6)–C(60)   | 124.95(8) | H(71b)–C(71)–H(71C) | 109.5     |
| C(b8)–C(b7)–C(a7)   | 106.54(8) | C(b8)–C(80)–C(81)   | 112.61(8) |
| C(b8)–C(b7)–C(70)   | 127.90(8) | C(b8)–C(80)–H(80a)  | 109.1     |
| C(a7)–C(b7)–C(70)   | 125.54(8) | C(81)–C(80)–H(80a)  | 109.1     |
| C(b7)–C(b8)–C(a8)   | 106.44(8) | C(b8)–C(80)–H(80b)  | 109.1     |
| C(b7)–C(b8)–C(80)   | 127.99(8) | C(81)–C(80)–H(80b)  | 109.1     |
| C(a8)–C(b8)–C(80)   | 125.58(8) | H(80a)–C(80)–H(80b) | 107.8     |
| C(b1)–C(10)–C(11)   | 112.14(8) | C(80)–C(81)–H(81a)  | 109.5     |
| C(b1)–C(10)–H(10a)  | 109.2     | C(80)–C(81)–H(81b)  | 109.5     |
| C(11)–C(10)–H(10a)  | 109.2     | H(81a)–C(81)–H(81b) | 109.5     |
| C(b1)–C(10)–H(10b)  | 109.2     | C(80)–C(81)–H(81C)  | 109.5     |
| C(11)–C(10)–H(10b)  | 109.2     | H(81a)–C(81)–H(81C) | 109.5     |
| H(10a)–C(10)–H(10b) | 107.9     | H(81b)–C(81)–H(81C) | 109.5     |
| C(10)–C(11)–H(11a)  | 109.5     | O(1)–C(1)–Fe(1)     | 177.20(8) |
| C(10)–C(11)–H(11b)  | 109.5     |                     |           |

<sup>a</sup>The estimated standard deviations of the least significant digits are given in parentheses.

**Table S6.** Anisotropic Displacement Parameters ( $\text{\AA}^2$ ) for  $[\text{Fe}(\text{OEP})(\text{CO})]^a$ 

| atom  | $U_{11}$  | $U_{22}$  | $U_{33}$  | $U_{23}$  | $U_{13}$  | $U_{12}$   |
|-------|-----------|-----------|-----------|-----------|-----------|------------|
| Fe(1) | 0.0107(1) | 0.0084(1) | 0.0129(1) | 0.0032(1) | 0.0038(1) | 0.0023(1)  |
| N(1)  | 0.0127(3) | 0.0097(3) | 0.0134(3) | 0.0037(2) | 0.0043(2) | 0.0027(2)  |
| N(2)  | 0.0124(3) | 0.0097(3) | 0.0146(3) | 0.0041(2) | 0.0049(2) | 0.0026(2)  |
| N(3)  | 0.0119(3) | 0.0095(3) | 0.0154(3) | 0.0034(2) | 0.0044(2) | 0.0021(2)  |
| N(4)  | 0.0126(3) | 0.0097(3) | 0.0143(3) | 0.0032(2) | 0.0036(2) | 0.0023(2)  |
| C(M1) | 0.0132(3) | 0.0111(3) | 0.0161(4) | 0.0049(3) | 0.0050(3) | 0.0022(3)  |
| C(M2) | 0.0141(3) | 0.0114(3) | 0.0170(4) | 0.0043(3) | 0.0064(3) | 0.0038(3)  |
| C(M3) | 0.0134(3) | 0.0108(3) | 0.0173(4) | 0.0043(3) | 0.0038(3) | 0.0012(3)  |
| C(M4) | 0.0151(3) | 0.0120(3) | 0.0150(3) | 0.0032(3) | 0.0053(3) | 0.0040(3)  |
| C(A1) | 0.0133(3) | 0.0122(3) | 0.0134(3) | 0.0042(3) | 0.0047(3) | 0.0035(3)  |
| C(A2) | 0.0123(3) | 0.0116(3) | 0.0139(3) | 0.0049(3) | 0.0042(3) | 0.0028(3)  |
| C(A3) | 0.0124(3) | 0.0100(3) | 0.0147(3) | 0.0042(3) | 0.0038(3) | 0.0026(3)  |
| C(A4) | 0.0130(3) | 0.0100(3) | 0.0149(3) | 0.0040(3) | 0.0045(3) | 0.0032(3)  |
| C(A5) | 0.0120(3) | 0.0117(3) | 0.0157(3) | 0.0049(3) | 0.0051(3) | 0.0029(3)  |
| C(A6) | 0.0120(3) | 0.0113(3) | 0.0156(3) | 0.0046(3) | 0.0036(3) | 0.0019(3)  |
| C(A7) | 0.0133(3) | 0.0100(3) | 0.0151(3) | 0.0036(3) | 0.0024(3) | 0.0022(3)  |
| C(A8) | 0.0140(3) | 0.0105(3) | 0.0136(3) | 0.0029(3) | 0.0029(3) | 0.0034(3)  |
| C(B1) | 0.0142(3) | 0.0144(4) | 0.0141(3) | 0.0055(3) | 0.0059(3) | 0.0041(3)  |
| C(B2) | 0.0135(3) | 0.0135(3) | 0.0142(3) | 0.0057(3) | 0.0053(3) | 0.0033(3)  |
| C(B3) | 0.0136(3) | 0.0096(3) | 0.0144(3) | 0.0035(3) | 0.0033(3) | 0.0026(3)  |
| C(B4) | 0.0138(3) | 0.0100(3) | 0.0142(3) | 0.0032(3) | 0.0036(3) | 0.0031(3)  |
| C(B5) | 0.0124(3) | 0.0138(4) | 0.0158(3) | 0.0058(3) | 0.0049(3) | 0.0027(3)  |
| C(B6) | 0.0119(3) | 0.0129(3) | 0.0159(3) | 0.0052(3) | 0.0039(3) | 0.0014(3)  |
| C(B7) | 0.0145(3) | 0.0099(3) | 0.0149(3) | 0.0032(3) | 0.0015(3) | 0.0025(3)  |
| C(B8) | 0.0150(3) | 0.0102(3) | 0.0142(3) | 0.0024(3) | 0.0019(3) | 0.0037(3)  |
| C(10) | 0.0215(4) | 0.0166(4) | 0.0201(4) | 0.0067(3) | 0.0125(3) | 0.0063(3)  |
| C(11) | 0.0278(5) | 0.0313(5) | 0.0366(6) | 0.0170(5) | 0.0178(5) | 0.0177(4)  |
| C(20) | 0.0182(4) | 0.0152(4) | 0.0194(4) | 0.0080(3) | 0.0085(3) | 0.0029(3)  |
| C(21) | 0.0166(4) | 0.0197(4) | 0.0274(5) | 0.0094(4) | 0.0057(3) | -0.0001(3) |
| C(30) | 0.0156(4) | 0.0105(3) | 0.0182(4) | 0.0034(3) | 0.0045(3) | 0.0011(3)  |
| C(31) | 0.0240(4) | 0.0161(4) | 0.0272(5) | 0.0109(4) | 0.0057(4) | 0.0022(3)  |
| C(40) | 0.0168(4) | 0.0112(3) | 0.0158(4) | 0.0024(3) | 0.0055(3) | 0.0040(3)  |
| C(41) | 0.0215(4) | 0.0174(4) | 0.0225(4) | 0.0057(3) | 0.0066(3) | 0.0097(3)  |
| C(50) | 0.0161(4) | 0.0166(4) | 0.0194(4) | 0.0074(3) | 0.0090(3) | 0.0052(3)  |

**Table S6.** Continued

| atom  | $U_{11}$  | $U_{22}$  | $U_{33}$  | $U_{23}$  | $U_{13}$  | $U_{12}$   |
|-------|-----------|-----------|-----------|-----------|-----------|------------|
| C(51) | 0.0255(5) | 0.0418(6) | 0.0322(5) | 0.0203(5) | 0.0148(4) | 0.0207(5)  |
| C(60) | 0.0148(4) | 0.0148(4) | 0.0182(4) | 0.0063(3) | 0.0051(3) | -0.0003(3) |
| C(61) | 0.0166(4) | 0.0215(4) | 0.0209(4) | 0.0069(4) | 0.0032(3) | -0.0025(3) |
| C(70) | 0.0167(4) | 0.0102(3) | 0.0176(4) | 0.0030(3) | 0.0012(3) | 0.0007(3)  |
| C(71) | 0.0223(4) | 0.0158(4) | 0.0225(4) | 0.0086(3) | 0.0025(3) | 0.0021(3)  |
| C(80) | 0.0174(4) | 0.0123(3) | 0.0152(4) | 0.0010(3) | 0.0028(3) | 0.0045(3)  |
| C(81) | 0.0206(4) | 0.0187(4) | 0.0216(4) | 0.0051(3) | 0.0043(3) | 0.0091(3)  |
| C(1)  | 0.0152(4) | 0.0116(3) | 0.0181(4) | 0.0051(3) | 0.0070(3) | 0.0027(3)  |
| O(1)  | 0.0211(3) | 0.0251(4) | 0.0217(3) | 0.0106(3) | 0.0022(3) | 0.0040(3)  |

<sup>a</sup>The estimated standard deviations of the least significant digits are given in parentheses. The anisotropic displacement factor exponent takes the form:  $-2 \pi [\text{h}^2 U_{11} + \dots + 2 \text{h k a}^* \text{ b}^* U_{12}]$ .



**Table S7.** Hydrogen Atom Coordinates and Equivalent Isotropic Displacement Parameters ( $\text{\AA}^2$ ) for  $[\text{Fe}(\text{OEP})(\text{CO})]^a$

| atom   | $x$     | $y$     | $z$     | $U(\text{eq})$ |
|--------|---------|---------|---------|----------------|
| H(MA)  | 0.1712  | -0.1443 | 0.2374  | 0.016          |
| H(MB)  | 0.6470  | -0.0289 | 0.0699  | 0.017          |
| H(MC)  | 0.7215  | 0.5977  | 0.2861  | 0.017          |
| H(MD)  | 0.2481  | 0.4823  | 0.4560  | 0.017          |
| H(10A) | 0.1085  | 0.3740  | 0.5163  | 0.022          |
| H(10B) | 0.0167  | 0.2268  | 0.4979  | 0.022          |
| H(11A) | -0.1183 | 0.3673  | 0.4547  | 0.042          |
| H(11B) | -0.1248 | 0.2360  | 0.3621  | 0.042          |
| H(11C) | -0.0334 | 0.3837  | 0.3812  | 0.042          |
| H(20A) | -0.0124 | -0.0044 | 0.4180  | 0.020          |
| H(20B) | 0.0708  | -0.1106 | 0.3680  | 0.020          |
| H(21A) | -0.1539 | -0.1841 | 0.2804  | 0.032          |
| H(21B) | -0.0628 | -0.1433 | 0.2167  | 0.032          |
| H(21C) | -0.1472 | -0.0389 | 0.2677  | 0.032          |
| H(30A) | 0.2360  | -0.4116 | 0.0385  | 0.019          |
| H(30B) | 0.1547  | -0.3360 | 0.1111  | 0.019          |
| H(31A) | 0.2308  | -0.5096 | 0.1552  | 0.033          |
| H(31B) | 0.3042  | -0.3619 | 0.2369  | 0.033          |
| H(31C) | 0.3820  | -0.4411 | 0.1628  | 0.033          |
| H(40A) | 0.5177  | -0.2507 | -0.0271 | 0.018          |
| H(40B) | 0.4277  | -0.3761 | -0.0137 | 0.018          |
| H(41A) | 0.6564  | -0.3846 | 0.0195  | 0.030          |
| H(41B) | 0.6022  | -0.3626 | 0.1127  | 0.030          |
| H(41C) | 0.6920  | -0.2342 | 0.1022  | 0.030          |
| H(50A) | 0.9043  | 0.2267  | 0.0466  | 0.020          |
| H(50B) | 0.7957  | 0.0839  | 0.0126  | 0.020          |
| H(51A) | 1.0081  | 0.0616  | 0.0833  | 0.043          |
| H(51B) | 0.9038  | 0.0388  | 0.1437  | 0.043          |
| H(51C) | 1.0108  | 0.1832  | 0.1802  | 0.043          |
| H(60A) | 0.8375  | 0.5636  | 0.1659  | 0.019          |
| H(60B) | 0.9211  | 0.4563  | 0.1177  | 0.019          |
| H(61A) | 1.0598  | 0.6323  | 0.2581  | 0.031          |
| H(61B) | 1.0471  | 0.4860  | 0.2697  | 0.031          |
| H(61C) | 0.9627  | 0.5922  | 0.3185  | 0.031          |

**Table S7.** Continued

| atom   | $x$    | $y$    | $z$    | $U(\text{eq})$ |
|--------|--------|--------|--------|----------------|
| H(70A) | 0.7341 | 0.7950 | 0.4106 | 0.019          |
| H(70B) | 0.6472 | 0.8712 | 0.4784 | 0.019          |
| H(71A) | 0.6501 | 0.9528 | 0.3526 | 0.031          |
| H(71B) | 0.5003 | 0.8833 | 0.3476 | 0.031          |
| H(71C) | 0.5802 | 0.7996 | 0.2771 | 0.031          |
| H(80A) | 0.4738 | 0.8270 | 0.5449 | 0.019          |
| H(80B) | 0.3704 | 0.7024 | 0.5497 | 0.019          |
| H(81A) | 0.2515 | 0.8544 | 0.5076 | 0.031          |
| H(81B) | 0.2114 | 0.7085 | 0.4201 | 0.031          |
| H(81C) | 0.3144 | 0.8359 | 0.4183 | 0.031          |

<sup>a</sup> $U(\text{eq})$  is defined as one third of the trace of the orthogonalized  $\mathbf{U}_{ij}$  tensor the estimated standard deviations of the least significant digits are given in parentheses.

## Supporting Information

**Table S8.** Complete Crystallographic Details for [Fe(OEP)(CO)]·C<sub>6</sub>H<sub>6</sub>

|                                                              |                                                                   |
|--------------------------------------------------------------|-------------------------------------------------------------------|
| formula                                                      | C <sub>43</sub> H <sub>50</sub> FeN <sub>4</sub> O                |
| FW, amu                                                      | 694.72                                                            |
| <i>a</i> , Å                                                 | 10.6217(3)                                                        |
| <i>b</i> , Å                                                 | 11.9368(3)                                                        |
| <i>c</i> , Å                                                 | 14.8297(4)                                                        |
| $\alpha$ , deg                                               | 77.0770(10)                                                       |
| $\beta$ , deg                                                | 86.616(2)                                                         |
| $\gamma$ , deg                                               | 80.194(2)                                                         |
| <i>V</i> , Å <sup>3</sup>                                    | 1805.42(8)                                                        |
| space group                                                  | <i>P</i> $\bar{1}$                                                |
| <i>Z</i>                                                     | 2                                                                 |
| D <sub>c</sub> , g/cm <sup>3</sup>                           | 1.278                                                             |
| F(000)                                                       | 740                                                               |
| $\mu$ , mm <sup>-1</sup>                                     | 0.457                                                             |
| crystal dimensions, mm                                       | 0.49 × 0.20 × 0.16                                                |
| radiation                                                    | MoK $\alpha$ , $\bar{\lambda}$ = 0.71073 Å                        |
| temperature, K                                               | 100(2)                                                            |
| diffractometer                                               | Bruker Apex CCD                                                   |
| $\theta$ range for collected data, deg                       | 1.41–31.00                                                        |
| index range                                                  | –15 ≤ <i>h</i> ≤ 15<br>–16 ≤ <i>k</i> ≤ 17<br>–21 ≤ <i>l</i> ≤ 21 |
| total data collected                                         | 62663                                                             |
| absorption correction                                        | Multiscan                                                         |
| relative transmission coefficients (I)                       | 0.9321 and 0.8070                                                 |
| unique data                                                  | 11512 ( <i>R</i> <sub>int</sub> = 0.036)                          |
| unique observed data [ <i>I</i> > 2 $\sigma$ ( <i>I</i> )]   | 9475                                                              |
| refinement method                                            | Full-matrix least-squares on <i>F</i> <sup>2</sup>                |
| data/restraints/parameters                                   | 11512/0/450                                                       |
| goodness-of-fit (pased on <i>F</i> <sup>2</sup> )            | 1.045                                                             |
| final <i>R</i> indices [ <i>I</i> > 2 $\sigma$ ( <i>I</i> )] | <i>R</i> <sub>1</sub> = 0.0348, <i>wR</i> <sub>2</sub> = 0.0843   |
| final <i>R</i> indices (all data)                            | <i>R</i> <sub>1</sub> = 0.0486, <i>wR</i> <sub>2</sub> = 0.0919   |

**Table S9.** Atomic Coordinates and Equivalent Isotropic Displacement Parameters ( $\text{\AA}^2$ ) for  $[\text{Fe}(\text{OEP})(\text{CO})]\cdot\text{C}_6\text{H}_6^a$

| atom  | $x$          | $y$          | $z$         | $U(\text{eq})$ |
|-------|--------------|--------------|-------------|----------------|
| Fe(1) | 0.37734(2)   | 0.35000(1)   | 0.45554(1)  | 0.0118(1)      |
| N(1)  | 0.44414(9)   | 0.25436(9)   | 0.36431(7)  | 0.0124(2)      |
| N(2)  | 0.26846(9)   | 0.45975(8)   | 0.35922(7)  | 0.0124(2)      |
| N(3)  | 0.33908(9)   | 0.46522(8)   | 0.53569(7)  | 0.0126(2)      |
| N(4)  | 0.51211(9)   | 0.25894(9)   | 0.54168(7)  | 0.0128(2)      |
| C(m1) | 0.31494(11)  | 0.35947(10)  | 0.23160(8)  | 0.0141(2)      |
| C(m2) | 0.16761(11)  | 0.60134(10)  | 0.44862(8)  | 0.0140(2)      |
| C(m3) | 0.48818(11)  | 0.37450(10)  | 0.66007(8)  | 0.0142(2)      |
| C(m4) | 0.59338(11)  | 0.10295(10)  | 0.46114(8)  | 0.0135(2)      |
| C(a1) | 0.53071(11)  | 0.15239(10)  | 0.37936(8)  | 0.0125(2)      |
| C(a2) | 0.40580(11)  | 0.26963(10)  | 0.27474(8)  | 0.0128(2)      |
| C(a3) | 0.25066(11)  | 0.44830(10)  | 0.27066(8)  | 0.0132(2)      |
| C(a4) | 0.18141(11)  | 0.55592(10)  | 0.37012(8)  | 0.0127(2)      |
| C(a5) | 0.24321(11)  | 0.56060(10)  | 0.52513(8)  | 0.0132(2)      |
| C(a6) | 0.39181(11)  | 0.46029(10)  | 0.61927(8)  | 0.0134(2)      |
| C(a7) | 0.54156(11)  | 0.27918(10)  | 0.62505(8)  | 0.0134(2)      |
| C(a8) | 0.58619(11)  | 0.15350(10)  | 0.53678(8)  | 0.0131(2)      |
| C(b1) | 0.54994(11)  | 0.10488(10)  | 0.29703(8)  | 0.0136(2)      |
| C(b2) | 0.47394(11)  | 0.17957(10)  | 0.23125(8)  | 0.0139(2)      |
| C(b3) | 0.15401(11)  | 0.53989(10)  | 0.22491(8)  | 0.0145(2)      |
| C(b4) | 0.11003(11)  | 0.60644(10)  | 0.28702(8)  | 0.0138(2)      |
| C(b5) | 0.23544(11)  | 0.61527(10)  | 0.60354(8)  | 0.0141(2)      |
| C(b6) | 0.32926(11)  | 0.55353(10)  | 0.66172(8)  | 0.0139(2)      |
| C(b7) | 0.63515(11)  | 0.18589(10)  | 0.67284(8)  | 0.0141(2)      |
| C(b8) | 0.66104(11)  | 0.10607(10)  | 0.61890(8)  | 0.0135(2)      |
| C(11) | 0.64141(11)  | -0.00261(11) | 0.28789(9)  | 0.0163(2)      |
| C(12) | 0.77913(13)  | 0.01917(12)  | 0.26990(11) | 0.0258(3)      |
| C(21) | 0.46465(13)  | 0.17777(11)  | 0.13144(8)  | 0.0188(2)      |
| C(22) | 0.52649(16)  | 0.27340(13)  | 0.06697(10) | 0.0282(3)      |
| C(31) | 0.11401(12)  | 0.55857(12)  | 0.12695(8)  | 0.0192(2)      |
| C(32) | 0.19947(16)  | 0.62794(16)  | 0.05853(10) | 0.0334(3)      |
| C(41) | 0.00477(11)  | 0.70902(10)  | 0.27463(8)  | 0.0155(2)      |
| C(42) | -0.12585(12) | 0.67093(11)  | 0.29681(9)  | 0.0200(2)      |
| C(51) | 0.13683(12)  | 0.71548(10)  | 0.61793(9)  | 0.0170(2)      |

**Table S9.** Continued

| atom  | <i>x</i>    | <i>y</i>     | <i>z</i>    | <i>U</i> (eq) |
|-------|-------------|--------------|-------------|---------------|
| C(52) | 0.01644(13) | 0.67419(12)  | 0.66574(10) | 0.0249(3)     |
| C(61) | 0.36280(12) | 0.57186(11)  | 0.75340(8)  | 0.0173(2)     |
| C(62) | 0.30452(14) | 0.49457(13)  | 0.83620(9)  | 0.0241(3)     |
| C(71) | 0.68766(12) | 0.18096(11)  | 0.76535(8)  | 0.0170(2)     |
| C(72) | 0.59808(14) | 0.14053(14)  | 0.84566(9)  | 0.0256(3)     |
| C(81) | 0.75305(11) | −0.00600(10) | 0.63676(8)  | 0.0155(2)     |
| C(82) | 0.88487(13) | 0.00863(12)  | 0.59375(11) | 0.0262(3)     |
| C(1)  | 0.26187(12) | 0.26712(11)  | 0.49735(8)  | 0.0159(2)     |
| O(1)  | 0.18732(9)  | 0.20987(9)   | 0.52230(7)  | 0.0225(2)     |
| C(90) | 0.84363(16) | 0.73398(16)  | 0.98868(12) | 0.0359(4)     |
| C(91) | 0.90715(16) | 0.77079(18)  | 0.90674(13) | 0.0399(4)     |
| C(92) | 0.92837(18) | 0.88518(19)  | 0.88154(14) | 0.0469(5)     |
| C(93) | 0.8863(2)   | 0.96126(19)  | 0.93885(16) | 0.0560(6)     |
| C(94) | 0.8223(2)   | 0.9229(2)    | 1.02077(15) | 0.0569(6)     |
| C(95) | 0.80212(19) | 0.80932(18)  | 1.04512(12) | 0.0437(4)     |

<sup>a</sup>*U*(eq) is defined as one third of the trace of the orthogonalized  $\mathbf{U}_{ij}$  tensor. The estimated standard deviations of the least significant digits are given in parentheses.

**Table S10.** Bond Lengths for [Fe(OEP)(CO)]·C<sub>6</sub>H<sub>6</sub><sup>a</sup>

| bond        | length (Å) | bond         | length (Å) |
|-------------|------------|--------------|------------|
| Fe(1)–C(1)  | 1.7077(13) | C(22)–H(22a) | 0.9800     |
| Fe(1)–N(4)  | 1.9818(10) | C(22)–H(22b) | 0.9800     |
| Fe(1)–N(2)  | 1.9839(10) | C(22)–H(22C) | 0.9800     |
| Fe(1)–N(1)  | 1.9846(10) | C(31)–C(32)  | 1.520(2)   |
| Fe(1)–N(3)  | 1.9883(10) | C(31)–H(31a) | 0.9900     |
| N(1)–C(a2)  | 1.3761(15) | C(31)–H(31b) | 0.9900     |
| N(1)–C(a1)  | 1.3778(14) | C(32)–H(32a) | 0.9800     |
| N(2)–C(a3)  | 1.3776(15) | C(32)–H(32b) | 0.9800     |
| N(2)–C(a4)  | 1.3794(14) | C(32)–H(32C) | 0.9800     |
| N(3)–C(a6)  | 1.3753(15) | C(41)–C(42)  | 1.5277(17) |
| N(3)–C(a5)  | 1.3791(14) | C(41)–H(41a) | 0.9900     |
| N(4)–C(a7)  | 1.3748(15) | C(41)–H(41b) | 0.9900     |
| N(4)–C(a8)  | 1.3803(14) | C(42)–H(42a) | 0.9800     |
| C(m1)–C(a2) | 1.3799(16) | C(42)–H(42b) | 0.9800     |
| C(m1)–C(a3) | 1.3811(16) | C(42)–H(42C) | 0.9800     |
| C(m1)–H(ma) | 0.9500     | C(51)–C(52)  | 1.5271(18) |
| C(m2)–C(a5) | 1.3771(16) | C(51)–H(51a) | 0.9900     |
| C(m2)–C(a4) | 1.3805(16) | C(51)–H(51b) | 0.9900     |
| C(m2)–H(mb) | 0.9500     | C(52)–H(52a) | 0.9800     |
| C(m3)–C(a7) | 1.3767(16) | C(52)–H(52b) | 0.9800     |
| C(m3)–C(a6) | 1.3789(16) | C(52)–H(52C) | 0.9800     |
| C(m3)–H(mC) | 0.9500     | C(61)–C(62)  | 1.5297(18) |
| C(m4)–C(a1) | 1.3797(16) | C(61)–H(61a) | 0.9900     |
| C(m4)–C(a8) | 1.3802(16) | C(61)–H(61b) | 0.9900     |
| C(m4)–H(md) | 0.9500     | C(62)–H(62a) | 0.9800     |
| C(a1)–C(b1) | 1.4472(16) | C(62)–H(62b) | 0.9800     |
| C(a2)–C(b2) | 1.4441(16) | C(62)–H(62C) | 0.9800     |
| C(a3)–C(b3) | 1.4413(16) | C(71)–C(72)  | 1.5238(18) |
| C(a4)–C(b4) | 1.4420(16) | C(71)–H(71a) | 0.9900     |
| C(a5)–C(b5) | 1.4472(16) | C(71)–H(71b) | 0.9900     |
| C(a6)–C(b6) | 1.4451(16) | C(72)–H(72a) | 0.9800     |
| C(a7)–C(b7) | 1.4436(16) | C(72)–H(72b) | 0.9800     |
| C(a8)–C(b8) | 1.4452(16) | C(72)–H(72C) | 0.9800     |
| C(b1)–C(b2) | 1.3627(16) | C(81)–C(82)  | 1.5250(17) |

**Table S10.** Continued

| bond         | length (Å) | bond         | length (Å) |
|--------------|------------|--------------|------------|
| C(b1)–C(11)  | 1.4988(16) | C(81)–H(81a) | 0.9900     |
| C(b2)–C(21)  | 1.4943(16) | C(81)–H(81b) | 0.9900     |
| C(b3)–C(b4)  | 1.3593(17) | C(82)–H(82a) | 0.9800     |
| C(b3)–C(31)  | 1.4955(17) | C(82)–H(82b) | 0.9800     |
| C(b4)–C(41)  | 1.4968(16) | C(82)–H(82C) | 0.9800     |
| C(b5)–C(b6)  | 1.3592(17) | C(1)–O(1)    | 1.1259(16) |
| C(b5)–C(51)  | 1.4948(16) | C(90)–C(95)  | 1.364(3)   |
| C(b6)–C(61)  | 1.4968(17) | C(90)–C(91)  | 1.375(2)   |
| C(b7)–C(b8)  | 1.3597(16) | C(90)–H(90a) | 0.9500     |
| C(b7)–C(71)  | 1.4965(16) | C(91)–C(92)  | 1.386(3)   |
| C(b8)–C(81)  | 1.4973(16) | C(91)–H(91a) | 0.9500     |
| C(11)–C(12)  | 1.5268(18) | C(92)–C(93)  | 1.382(3)   |
| C(11)–H(11a) | 0.9900     | C(92)–H(92a) | 0.9500     |
| C(11)–H(11b) | 0.9900     | C(93)–C(94)  | 1.381(3)   |
| C(12)–H(12a) | 0.9800     | C(93)–H(93a) | 0.9500     |
| C(12)–H(12b) | 0.9800     | C(94)–C(95)  | 1.373(3)   |
| C(12)–H(12C) | 0.9800     | C(94)–H(94a) | 0.9500     |
| C(21)–C(22)  | 1.5304(19) | C(95)–H(95a) | 0.9500     |
| C(21)–H(21a) | 0.9900     |              |            |
| C(21)–H(21b) | 0.9900     |              |            |

<sup>a</sup>The estimated standard deviations of the least significant digits are given in parentheses.

**Table S11.** Bond Angles for [Fe(OEP)(CO)]·C<sub>6</sub>H<sub>6</sub><sup>a</sup>

| angle             | degree     | angle               | degree     |
|-------------------|------------|---------------------|------------|
| C(1)–Fe(1)–N(4)   | 96.38(5)   | H(21a)–C(21)–H(21b) | 107.8      |
| C(1)–Fe(1)–N(2)   | 94.80(5)   | C(21)–C(22)–H(22a)  | 109.5      |
| N(4)–Fe(1)–N(2)   | 168.82(4)  | C(21)–C(22)–H(22b)  | 109.5      |
| C(1)–Fe(1)–N(1)   | 93.31(5)   | H(22a)–C(22)–H(22b) | 109.5      |
| N(4)–Fe(1)–N(1)   | 89.12(4)   | C(21)–C(22)–H(22C)  | 109.5      |
| N(2)–Fe(1)–N(1)   | 89.99(4)   | H(22a)–C(22)–H(22C) | 109.5      |
| C(1)–Fe(1)–N(3)   | 98.76(5)   | H(22b)–C(22)–H(22C) | 109.5      |
| N(4)–Fe(1)–N(3)   | 89.62(4)   | C(b3)–C(31)–C(32)   | 112.65(11) |
| N(2)–Fe(1)–N(3)   | 88.92(4)   | C(b3)–C(31)–H(31a)  | 109.1      |
| N(1)–Fe(1)–N(3)   | 167.92(4)  | C(32)–C(31)–H(31a)  | 109.1      |
| C(a2)–N(1)–C(a1)  | 104.87(9)  | C(b3)–C(31)–H(31b)  | 109.1      |
| C(a2)–N(1)–Fe(1)  | 127.49(8)  | C(32)–C(31)–H(31b)  | 109.1      |
| C(a1)–N(1)–Fe(1)  | 127.42(8)  | H(31a)–C(31)–H(31b) | 107.8      |
| C(a3)–N(2)–C(a4)  | 104.70(9)  | C(31)–C(32)–H(32a)  | 109.5      |
| C(a3)–N(2)–Fe(1)  | 127.53(8)  | C(31)–C(32)–H(32b)  | 109.5      |
| C(a4)–N(2)–Fe(1)  | 127.27(8)  | H(32a)–C(32)–H(32b) | 109.5      |
| C(a6)–N(3)–C(a5)  | 104.49(9)  | C(31)–C(32)–H(32C)  | 109.5      |
| C(a6)–N(3)–Fe(1)  | 127.78(8)  | H(32a)–C(32)–H(32C) | 109.5      |
| C(a5)–N(3)–Fe(1)  | 127.34(8)  | H(32b)–C(32)–H(32C) | 109.5      |
| C(a7)–N(4)–C(a8)  | 104.60(9)  | C(b4)–C(41)–C(42)   | 111.37(10) |
| C(a7)–N(4)–Fe(1)  | 127.59(8)  | C(b4)–C(41)–H(41a)  | 109.4      |
| C(a8)–N(4)–Fe(1)  | 127.37(8)  | C(42)–C(41)–H(41a)  | 109.4      |
| C(a2)–C(m1)–C(a3) | 125.50(11) | C(b4)–C(41)–H(41b)  | 109.4      |
| C(a2)–C(m1)–H(ma) | 117.3      | C(42)–C(41)–H(41b)  | 109.4      |
| C(a3)–C(m1)–H(ma) | 117.3      | H(41a)–C(41)–H(41b) | 108.0      |
| C(a5)–C(m2)–C(a4) | 124.70(11) | C(41)–C(42)–H(42a)  | 109.5      |
| C(a5)–C(m2)–H(mb) | 117.7      | C(41)–C(42)–H(42b)  | 109.5      |
| C(a4)–C(m2)–H(mb) | 117.7      | H(42a)–C(42)–H(42b) | 109.5      |
| C(a7)–C(m3)–C(a6) | 124.97(11) | C(41)–C(42)–H(42C)  | 109.5      |
| C(a7)–C(m3)–H(mC) | 117.5      | H(42a)–C(42)–H(42C) | 109.5      |
| C(a6)–C(m3)–H(mC) | 117.5      | H(42b)–C(42)–H(42C) | 109.5      |
| C(a1)–C(m4)–C(a8) | 124.69(11) | C(b5)–C(51)–C(52)   | 111.45(10) |
| C(a1)–C(m4)–H(md) | 117.7      | C(b5)–C(51)–H(51a)  | 109.3      |
| C(a8)–C(m4)–H(md) | 117.7      | C(52)–C(51)–H(51a)  | 109.3      |



**Table S11.** Continued

| angle             | degree     | angle               | degree     |
|-------------------|------------|---------------------|------------|
| N(1)–C(a1)–C(m4)  | 124.82(10) | C(b5)–C(51)–H(51b)  | 109.3      |
| N(1)–C(a1)–C(b1)  | 111.01(10) | C(52)–C(51)–H(51b)  | 109.3      |
| C(m4)–C(a1)–C(b1) | 124.15(11) | H(51a)–C(51)–H(51b) | 108.0      |
| N(1)–C(a2)–C(m1)  | 124.67(10) | C(51)–C(52)–H(52a)  | 109.5      |
| N(1)–C(a2)–C(b2)  | 111.08(10) | C(51)–C(52)–H(52b)  | 109.5      |
| C(m1)–C(a2)–C(b2) | 124.24(11) | H(52a)–C(52)–H(52b) | 109.5      |
| N(2)–C(a3)–C(m1)  | 124.49(11) | C(51)–C(52)–H(52C)  | 109.5      |
| N(2)–C(a3)–C(b3)  | 110.98(10) | H(52a)–C(52)–H(52C) | 109.5      |
| C(m1)–C(a3)–C(b3) | 124.51(11) | H(52b)–C(52)–H(52C) | 109.5      |
| N(2)–C(a4)–C(m2)  | 124.76(11) | C(b6)–C(61)–C(62)   | 113.80(10) |
| N(2)–C(a4)–C(b4)  | 111.11(10) | C(b6)–C(61)–H(61a)  | 108.8      |
| C(m2)–C(a4)–C(b4) | 124.08(11) | C(62)–C(61)–H(61a)  | 108.8      |
| C(m2)–C(a5)–N(3)  | 124.61(10) | C(b6)–C(61)–H(61b)  | 108.8      |
| C(m2)–C(a5)–C(b5) | 124.21(11) | C(62)–C(61)–H(61b)  | 108.8      |
| N(3)–C(a5)–C(b5)  | 111.14(10) | H(61a)–C(61)–H(61b) | 107.7      |
| N(3)–C(a6)–C(m3)  | 124.66(11) | C(61)–C(62)–H(62a)  | 109.5      |
| N(3)–C(a6)–C(b6)  | 111.48(10) | C(61)–C(62)–H(62b)  | 109.5      |
| C(m3)–C(a6)–C(b6) | 123.79(11) | H(62a)–C(62)–H(62b) | 109.5      |
| N(4)–C(a7)–C(m3)  | 125.08(11) | C(61)–C(62)–H(62C)  | 109.5      |
| N(4)–C(a7)–C(b7)  | 111.14(10) | H(62a)–C(62)–H(62C) | 109.5      |
| C(m3)–C(a7)–C(b7) | 123.77(11) | H(62b)–C(62)–H(62C) | 109.5      |
| C(m4)–C(a8)–N(4)  | 124.42(11) | C(b7)–C(71)–C(72)   | 113.07(10) |
| C(m4)–C(a8)–C(b8) | 124.24(11) | C(b7)–C(71)–H(71a)  | 109.0      |
| N(4)–C(a8)–C(b8)  | 111.25(10) | C(72)–C(71)–H(71a)  | 109.0      |
| C(b2)–C(b1)–C(a1) | 106.38(10) | C(b7)–C(71)–H(71b)  | 109.0      |
| C(b2)–C(b1)–C(11) | 128.40(11) | C(72)–C(71)–H(71b)  | 109.0      |
| C(a1)–C(b1)–C(11) | 125.16(11) | H(71a)–C(71)–H(71b) | 107.8      |
| C(b1)–C(b2)–C(a2) | 106.56(10) | C(71)–C(72)–H(72a)  | 109.5      |
| C(b1)–C(b2)–C(21) | 128.88(11) | C(71)–C(72)–H(72b)  | 109.5      |
| C(a2)–C(b2)–C(21) | 124.46(11) | H(72a)–C(72)–H(72b) | 109.5      |
| C(b4)–C(b3)–C(a3) | 106.76(10) | C(71)–C(72)–H(72C)  | 109.5      |
| C(b4)–C(b3)–C(31) | 127.33(11) | H(72a)–C(72)–H(72C) | 109.5      |
| C(a3)–C(b3)–C(31) | 125.88(11) | H(72b)–C(72)–H(72C) | 109.5      |
| C(b3)–C(b4)–C(a4) | 106.42(10) | C(b8)–C(81)–C(82)   | 112.19(10) |

**Table S11.** Continued

| angle               | degree     | angle               | degree     |
|---------------------|------------|---------------------|------------|
| C(b3)–C(b4)–C(41)   | 127.59(11) | C(b8)–C(81)–H(81a)  | 109.2      |
| C(a4)–C(b4)–C(41)   | 125.94(11) | C(82)–C(81)–H(81a)  | 109.2      |
| C(b6)–C(b5)–C(a5)   | 106.53(10) | C(b8)–C(81)–H(81b)  | 109.2      |
| C(b6)–C(b5)–C(51)   | 128.04(11) | C(82)–C(81)–H(81b)  | 109.2      |
| C(a5)–C(b5)–C(51)   | 125.34(11) | H(81a)–C(81)–H(81b) | 107.9      |
| C(b5)–C(b6)–C(a6)   | 106.34(10) | C(81)–C(82)–H(82a)  | 109.5      |
| C(b5)–C(b6)–C(61)   | 128.82(11) | C(81)–C(82)–H(82b)  | 109.5      |
| C(a6)–C(b6)–C(61)   | 124.81(11) | H(82a)–C(82)–H(82b) | 109.5      |
| C(b8)–C(b7)–C(a7)   | 106.78(10) | C(81)–C(82)–H(82C)  | 109.5      |
| C(b8)–C(b7)–C(71)   | 128.51(11) | H(82a)–C(82)–H(82C) | 109.5      |
| C(a7)–C(b7)–C(71)   | 124.68(11) | H(82b)–C(82)–H(82C) | 109.5      |
| C(b7)–C(b8)–C(a8)   | 106.19(10) | O(1)–C(1)–Fe(1)     | 177.20(11) |
| C(b7)–C(b8)–C(81)   | 127.93(11) | C(95)–C(90)–C(91)   | 120.28(18) |
| C(a8)–C(b8)–C(81)   | 125.82(11) | C(95)–C(90)–H(90a)  | 119.9      |
| C(b1)–C(11)–C(12)   | 112.86(10) | C(91)–C(90)–H(90a)  | 119.9      |
| C(b1)–C(11)–H(11a)  | 109.0      | C(90)–C(91)–C(92)   | 119.60(19) |
| C(12)–C(11)–H(11a)  | 109.0      | C(90)–C(91)–H(91a)  | 120.2      |
| C(b1)–C(11)–H(11b)  | 109.0      | C(92)–C(91)–H(91a)  | 120.2      |
| C(12)–C(11)–H(11b)  | 109.0      | C(93)–C(92)–C(91)   | 119.98(19) |
| H(11a)–C(11)–H(11b) | 107.8      | C(93)–C(92)–H(92a)  | 120.0      |
| C(11)–C(12)–H(12a)  | 109.5      | C(91)–C(92)–H(92a)  | 120.0      |
| C(11)–C(12)–H(12b)  | 109.5      | C(94)–C(93)–C(92)   | 119.64(19) |
| H(12a)–C(12)–H(12b) | 109.5      | C(94)–C(93)–H(93a)  | 120.2      |
| C(11)–C(12)–H(12C)  | 109.5      | C(92)–C(93)–H(93a)  | 120.2      |
| H(12a)–C(12)–H(12C) | 109.5      | C(95)–C(94)–C(93)   | 119.9(2)   |
| H(12b)–C(12)–H(12C) | 109.5      | C(95)–C(94)–H(94a)  | 120.1      |
| C(b2)–C(21)–C(22)   | 112.60(11) | C(93)–C(94)–H(94a)  | 120.1      |
| C(b2)–C(21)–H(21a)  | 109.1      | C(90)–C(95)–C(94)   | 120.63(19) |
| C(22)–C(21)–H(21a)  | 109.1      | C(90)–C(95)–H(95a)  | 119.7      |
| C(b2)–C(21)–H(21b)  | 109.1      | C(94)–C(95)–H(95a)  | 119.7      |
| C(22)–C(21)–H(21b)  | 109.1      |                     |            |

<sup>a</sup>The estimated standard deviations of the least significant digits are given in parentheses.

**Table S12.** Anisotropic Displacement Parameters ( $\text{\AA}^2$ ) for  $[\text{Fe}(\text{OEP})(\text{CO})]\cdot\text{C}_6\text{H}_6^a$ 

| atom  | $U_{11}$  | $U_{22}$  | $U_{33}$  | $U_{23}$   | $U_{13}$   | $U_{12}$   |
|-------|-----------|-----------|-----------|------------|------------|------------|
| Fe(1) | 0.0120(1) | 0.0118(1) | 0.0115(1) | -0.0035(1) | 0.0000(1)  | -0.0001(1) |
| N(1)  | 0.0116(4) | 0.0132(4) | 0.0122(4) | -0.0030(3) | 0.0004(3)  | -0.0014(3) |
| N(2)  | 0.0124(4) | 0.0119(4) | 0.0127(4) | -0.0028(3) | 0.0006(3)  | -0.0013(3) |
| N(3)  | 0.0129(4) | 0.0123(4) | 0.0124(4) | -0.0032(3) | 0.0005(3)  | -0.0014(3) |
| N(4)  | 0.0122(4) | 0.0137(4) | 0.0127(4) | -0.0045(3) | 0.0004(3)  | -0.0010(3) |
| C(M1) | 0.0137(5) | 0.0162(5) | 0.0129(5) | -0.0036(4) | -0.0012(4) | -0.0028(4) |
| C(M2) | 0.0138(5) | 0.0116(5) | 0.0159(5) | -0.0025(4) | 0.0019(4)  | -0.0014(4) |
| C(M3) | 0.0144(5) | 0.0153(5) | 0.0139(5) | -0.0046(4) | 0.0004(4)  | -0.0035(4) |
| C(M4) | 0.0132(5) | 0.0113(5) | 0.0154(5) | -0.0029(4) | 0.0008(4)  | -0.0006(4) |
| C(A1) | 0.0119(5) | 0.0124(5) | 0.0137(5) | -0.0039(4) | 0.0012(4)  | -0.0020(4) |
| C(A2) | 0.0120(5) | 0.0141(5) | 0.0131(5) | -0.0041(4) | 0.0007(4)  | -0.0032(4) |
| C(A3) | 0.0115(5) | 0.0143(5) | 0.0137(5) | -0.0024(4) | -0.0001(4) | -0.0025(4) |
| C(A4) | 0.0116(5) | 0.0108(5) | 0.0148(5) | -0.0013(4) | 0.0006(4)  | -0.0019(4) |
| C(A5) | 0.0146(5) | 0.0104(5) | 0.0146(5) | -0.0029(4) | 0.0022(4)  | -0.0028(4) |
| C(A6) | 0.0144(5) | 0.0132(5) | 0.0135(5) | -0.0044(4) | 0.0020(4)  | -0.0040(4) |
| C(A7) | 0.0120(5) | 0.0152(5) | 0.0129(5) | -0.0028(4) | 0.0001(4)  | -0.0023(4) |
| C(A8) | 0.0111(5) | 0.0135(5) | 0.0139(5) | -0.0021(4) | 0.0010(4)  | -0.0018(4) |
| C(B1) | 0.0129(5) | 0.0131(5) | 0.0161(5) | -0.0059(4) | 0.0009(4)  | -0.0025(4) |
| C(B2) | 0.0142(5) | 0.0143(5) | 0.0145(5) | -0.0056(4) | 0.0004(4)  | -0.0034(4) |
| C(B3) | 0.0132(5) | 0.0139(5) | 0.0154(5) | -0.0011(4) | -0.0014(4) | -0.0025(4) |
| C(B4) | 0.0127(5) | 0.0121(5) | 0.0156(5) | -0.0002(4) | -0.0009(4) | -0.0026(4) |
| C(B5) | 0.0171(5) | 0.0111(5) | 0.0151(5) | -0.0041(4) | 0.0033(4)  | -0.0044(4) |
| C(B6) | 0.0164(5) | 0.0124(5) | 0.0144(5) | -0.0046(4) | 0.0034(4)  | -0.0053(4) |
| C(B7) | 0.0122(5) | 0.0166(5) | 0.0133(5) | -0.0025(4) | -0.0008(4) | -0.0022(4) |
| C(B8) | 0.0115(5) | 0.0143(5) | 0.0138(5) | -0.0013(4) | -0.0002(4) | -0.0019(4) |
| C(11) | 0.0164(5) | 0.0149(5) | 0.0188(6) | -0.0077(4) | -0.0004(4) | -0.0004(4) |
| C(12) | 0.0174(6) | 0.0204(6) | 0.0406(8) | -0.0120(6) | 0.0046(5)  | -0.0002(5) |
| C(21) | 0.0216(6) | 0.0201(6) | 0.0159(5) | -0.0081(4) | -0.0022(4) | -0.0009(5) |
| C(22) | 0.0401(8) | 0.0282(7) | 0.0163(6) | -0.0065(5) | 0.0059(6)  | -0.0054(6) |
| C(31) | 0.0199(6) | 0.0209(6) | 0.0154(5) | -0.0032(4) | -0.0040(4) | 0.0009(5)  |
| C(32) | 0.0356(8) | 0.0452(9) | 0.0164(6) | 0.0006(6)  | 0.0019(6)  | -0.0087(7) |
| C(41) | 0.0150(5) | 0.0122(5) | 0.0177(5) | -0.0010(4) | -0.0019(4) | -0.0007(4) |
| C(42) | 0.0156(5) | 0.0179(6) | 0.0261(6) | -0.0054(5) | 0.0013(5)  | -0.0017(4) |
| C(51) | 0.0206(6) | 0.0115(5) | 0.0190(6) | -0.0051(4) | 0.0031(4)  | -0.0016(4) |

**Table S12.** Continued

| atom  | $U_{11}$   | $U_{22}$   | $U_{33}$   | $U_{23}$   | $U_{13}$    | $U_{12}$    |
|-------|------------|------------|------------|------------|-------------|-------------|
| C(52) | 0.0217(6)  | 0.0179(6)  | 0.0308(7)  | -0.0017(5) | 0.0083(5)   | 0.0008(5)   |
| C(61) | 0.0217(6)  | 0.0167(6)  | 0.0162(5)  | -0.0070(4) | 0.0017(4)   | -0.0064(4)  |
| C(62) | 0.0305(7)  | 0.0288(7)  | 0.0157(6)  | -0.0060(5) | 0.0016(5)   | -0.0113(6)  |
| C(71) | 0.0163(5)  | 0.0188(6)  | 0.0161(5)  | -0.0034(4) | -0.0028(4)  | -0.0028(4)  |
| C(72) | 0.0287(7)  | 0.0339(8)  | 0.0156(6)  | -0.0043(5) | 0.0004(5)   | -0.0103(6)  |
| C(81) | 0.0147(5)  | 0.0144(5)  | 0.0159(5)  | -0.0008(4) | -0.0011(4)  | -0.0009(4)  |
| C(82) | 0.0159(6)  | 0.0178(6)  | 0.0399(8)  | 0.0000(5)  | 0.0051(5)   | 0.0014(5)   |
| C(1)  | 0.0174(5)  | 0.0157(5)  | 0.0141(5)  | -0.0045(4) | -0.0011(4)  | 0.0007(4)   |
| O(1)  | 0.0230(5)  | 0.0236(5)  | 0.0222(5)  | -0.0052(4) | 0.0018(4)   | -0.0079(4)  |
| C(90) | 0.0318(8)  | 0.0388(9)  | 0.0344(8)  | 0.0032(7)  | -0.0126(7)  | -0.0086(7)  |
| C(91) | 0.0283(8)  | 0.0496(11) | 0.0401(9)  | -0.0057(8) | -0.0053(7)  | -0.0052(7)  |
| C(92) | 0.0316(9)  | 0.0629(13) | 0.0403(10) | 0.0121(9)  | -0.0116(7)  | -0.0185(9)  |
| C(93) | 0.0691(14) | 0.0386(11) | 0.0576(13) | 0.0107(9)  | -0.0372(11) | -0.0175(10) |
| C(94) | 0.0782(16) | 0.0481(12) | 0.0430(11) | -0.0123(9) | -0.0265(11) | 0.0053(11)  |
| C(95) | 0.0459(10) | 0.0529(11) | 0.0276(8)  | 0.0006(7)  | -0.0127(7)  | -0.0034(9)  |

<sup>a</sup>The estimated standard deviations of the least significant digits are given in parentheses. The anisotropic displacement factor exponent takes the form:  $-2 \pi [h^2 U_{11} + \dots + 2 h k a^* b^* U_{12}]$ .

**Table S13.** Hydrogen Atom Coordinates and Equivalent Isotropic Displacement Parameters ( $\text{\AA}^2$ ) for  $[\text{Fe}(\text{OEP})(\text{CO})]\cdot\text{C}_6\text{H}_6^a$

| atom   | $x$     | $y$     | $z$     | $U(\text{eq})$ |
|--------|---------|---------|---------|----------------|
| H(MA)  | 0.2949  | 0.3603  | 0.1698  | 0.017          |
| H(MB)  | 0.1012  | 0.6653  | 0.4500  | 0.017          |
| H(MC)  | 0.5202  | 0.3817  | 0.7166  | 0.017          |
| H(MD)  | 0.6452  | 0.0288  | 0.4657  | 0.016          |
| H(11A) | 0.6147  | -0.0329 | 0.2364  | 0.020          |
| H(11B) | 0.6373  | -0.0630 | 0.3454  | 0.020          |
| H(12A) | 0.8336  | -0.0521 | 0.2599  | 0.039          |
| H(12B) | 0.8091  | 0.0419  | 0.3234  | 0.039          |
| H(12C) | 0.7831  | 0.0818  | 0.2148  | 0.039          |
| H(21A) | 0.3735  | 0.1876  | 0.1159  | 0.023          |
| H(21B) | 0.5068  | 0.1010  | 0.1210  | 0.023          |
| H(22A) | 0.5139  | 0.2713  | 0.0025  | 0.042          |
| H(22B) | 0.6182  | 0.2607  | 0.0788  | 0.042          |
| H(22C) | 0.4870  | 0.3495  | 0.0783  | 0.042          |
| H(31A) | 0.0250  | 0.6003  | 0.1211  | 0.023          |
| H(31B) | 0.1158  | 0.4820  | 0.1112  | 0.023          |
| H(32A) | 0.1693  | 0.6378  | -0.0044 | 0.050          |
| H(32B) | 0.2875  | 0.5862  | 0.0630  | 0.050          |
| H(32C) | 0.1967  | 0.7046  | 0.0729  | 0.050          |
| H(41A) | 0.0067  | 0.7540  | 0.2099  | 0.019          |
| H(41B) | 0.0185  | 0.7605  | 0.3158  | 0.019          |
| H(42A) | -0.1925 | 0.7399  | 0.2893  | 0.030          |
| H(42B) | -0.1279 | 0.6262  | 0.3608  | 0.030          |
| H(42C) | -0.1409 | 0.6223  | 0.2546  | 0.030          |
| H(51A) | 0.1143  | 0.7680  | 0.5573  | 0.020          |
| H(51B) | 0.1726  | 0.7602  | 0.6561  | 0.020          |
| H(52A) | -0.0465 | 0.7418  | 0.6736  | 0.037          |
| H(52B) | 0.0381  | 0.6239  | 0.7265  | 0.037          |
| H(52C) | -0.0196 | 0.6304  | 0.6278  | 0.037          |
| H(61A) | 0.3334  | 0.6544  | 0.7558  | 0.021          |
| H(61B) | 0.4569  | 0.5564  | 0.7587  | 0.021          |
| H(62A) | 0.3333  | 0.5085  | 0.8937  | 0.036          |
| H(62B) | 0.3318  | 0.4126  | 0.8339  | 0.036          |
| H(62C) | 0.2111  | 0.5131  | 0.8340  | 0.036          |

**Table S13.** Continued

| atom   | $x$    | $y$     | $z$    | $U(\text{eq})$ |
|--------|--------|---------|--------|----------------|
| H(71A) | 0.7045 | 0.2593  | 0.7677 | 0.020          |
| H(71B) | 0.7702 | 0.1272  | 0.7727 | 0.020          |
| H(72A) | 0.6355 | 0.1423  | 0.9040 | 0.038          |
| H(72B) | 0.5856 | 0.0609  | 0.8463 | 0.038          |
| H(72C) | 0.5155 | 0.1924  | 0.8382 | 0.038          |
| H(81A) | 0.7189 | -0.0642 | 0.6111 | 0.019          |
| H(81B) | 0.7611 | -0.0360 | 0.7044 | 0.019          |
| H(82A) | 0.9429 | -0.0657 | 0.6094 | 0.039          |
| H(82B) | 0.9181 | 0.0676  | 0.6178 | 0.039          |
| H(82C) | 0.8783 | 0.0334  | 0.5263 | 0.039          |
| H(90A) | 0.8286 | 0.6557  | 1.0061 | 0.043          |
| H(91A) | 0.9363 | 0.7182  | 0.8676 | 0.048          |
| H(92A) | 0.9719 | 0.9113  | 0.8249 | 0.056          |
| H(93A) | 0.9013 | 1.0395  | 0.9220 | 0.067          |
| H(94A) | 0.7924 | 0.9749  | 1.0602 | 0.068          |
| H(95A) | 0.7588 | 0.7829  | 1.1018 | 0.052          |

<sup>a</sup> $U(\text{eq})$  is defined as one third of the trace of the orthogonalized  $\mathbf{U}_{ij}$  tensor the estimated standard deviations of the least significant digits are given in parentheses.

## Supporting Information

**Table S14.** Complete Crystallographic Details for [Fe(OEP)(CO)<sub>2</sub>]

|                                                              |                                                                   |
|--------------------------------------------------------------|-------------------------------------------------------------------|
| formula                                                      | C <sub>38</sub> H <sub>44</sub> FeN <sub>4</sub> O <sub>2</sub>   |
| FW, amu                                                      | 644.62                                                            |
| <i>a</i> , Å                                                 | 8.6165(2)                                                         |
| <i>b</i> , Å                                                 | 10.1648(2)                                                        |
| <i>c</i> , Å                                                 | 10.4369(2)                                                        |
| $\alpha$ , deg                                               | 81.2450(10)                                                       |
| $\beta$ , deg                                                | 67.2870(10)                                                       |
| $\gamma$ , deg                                               | 69.4660(10)                                                       |
| <i>V</i> , Å <sup>3</sup>                                    | 789.50(3)                                                         |
| space group                                                  | <i>P</i> $\bar{1}$                                                |
| <i>Z</i>                                                     | 1                                                                 |
| D <sub>c</sub> , g/cm <sup>3</sup>                           | 1.356                                                             |
| F(000)                                                       | 342                                                               |
| $\mu$ , mm <sup>-1</sup>                                     | 0.519                                                             |
| crystal dimensions, mm                                       | 0.15 × 0.09 × 0.08                                                |
| radiation                                                    | MoK $\alpha$ , $\bar{\lambda}$ = 0.71073 Å                        |
| temperature, K                                               | 100(2)                                                            |
| diffractometer                                               | Bruker Apex CCD                                                   |
| $\theta$ range for collected data, deg                       | 2.12–34.95                                                        |
| index range                                                  | –13 ≤ <i>h</i> ≤ 13<br>–16 ≤ <i>k</i> ≤ 16<br>–16 ≤ <i>l</i> ≤ 16 |
| total data collected                                         | 32619                                                             |
| absorption correction                                        | Semi-empirical fromequiv                                          |
| relative transmission coefficients (I)                       | 0.9597 and 0.9262                                                 |
| unique data                                                  | 6727 ( <i>R</i> <sub>int</sub> = 0.0297)                          |
| unique observed data [ <i>I</i> > 2 $\sigma$ ( <i>I</i> )]   | 5944                                                              |
| refinement method                                            | Full-matrix least-squares on <i>F</i> <sup>2</sup>                |
| data/restraints/parameters                                   | 6727/0/209                                                        |
| goodness-of-fit (pased on <i>F</i> <sup>2</sup> )            | 1.061                                                             |
| final <i>R</i> indices [ <i>I</i> > 2 $\sigma$ ( <i>I</i> )] | <i>R</i> <sub>1</sub> = 0.0329, <i>wR</i> <sub>2</sub> = 0.0826   |
| final <i>R</i> indices (all data)                            | <i>R</i> <sub>1</sub> = 0.0395, <i>wR</i> <sub>2</sub> = 0.0863   |

**Table S15.** Atomic Coordinates and Equivalent Isotropic Displacement Parameters ( $\text{\AA}^2$ ) for  $[\text{Fe}(\text{OEP})(\text{CO})_2]^a$

| atom  | $x$          | $y$          | $z$         | $U(\text{eq})$ |
|-------|--------------|--------------|-------------|----------------|
| Fe(1) | 0.5000       | 0.5000       | 0.5000      | 0.0088(1)      |
| N(1)  | 0.56919(10)  | 0.29160(8)   | 0.53950(8)  | 0.0104(1)      |
| N(2)  | 0.39155(10)  | 0.53624(8)   | 0.70538(8)  | 0.0105(1)      |
| C(m1) | 0.70407(12)  | 0.20635(9)   | 0.30187(9)  | 0.0119(1)      |
| C(m2) | 0.45048(12)  | 0.29399(9)   | 0.79390(9)  | 0.0122(1)      |
| C(a1) | 0.65303(11)  | 0.18543(9)   | 0.44469(9)  | 0.0107(1)      |
| C(a2) | 0.53363(11)  | 0.22598(9)   | 0.66770(9)  | 0.0110(1)      |
| C(a3) | 0.38776(11)  | 0.43807(9)   | 0.81170(9)  | 0.0111(1)      |
| C(a4) | 0.31886(11)  | 0.66471(9)   | 0.76766(9)  | 0.0108(1)      |
| C(b1) | 0.67248(11)  | 0.04901(9)   | 0.51488(9)  | 0.0114(1)      |
| C(b2) | 0.59642(12)  | 0.07481(9)   | 0.65371(9)  | 0.0114(1)      |
| C(b3) | 0.31163(11)  | 0.50607(9)   | 0.94506(9)  | 0.0111(1)      |
| C(b4) | 0.27025(11)  | 0.64699(9)   | 0.91684(9)  | 0.0113(1)      |
| C(11) | 0.76016(12)  | -0.09150(9)  | 0.44663(10) | 0.0137(2)      |
| C(12) | 0.95845(14)  | -0.15239(11) | 0.42214(12) | 0.0213(2)      |
| C(21) | 0.57875(13)  | -0.02948(10) | 0.77189(10) | 0.0151(2)      |
| C(22) | 0.71750(15)  | -0.05488(11) | 0.83804(11) | 0.0189(2)      |
| C(31) | 0.28627(12)  | 0.43414(10)  | 1.08481(9)  | 0.0137(2)      |
| C(32) | 0.09782(14)  | 0.42709(12)  | 1.16169(11) | 0.0215(2)      |
| C(41) | 0.19253(13)  | 0.76396(10)  | 1.01757(9)  | 0.0148(2)      |
| C(42) | -0.00884(14) | 0.83026(11)  | 1.05916(11) | 0.0206(2)      |
| C(1)  | 0.70700(13)  | 0.51143(10)  | 0.50671(10) | 0.0154(2)      |
| O(1)  | 0.82292(12)  | 0.52755(11)  | 0.51872(11) | 0.0324(2)      |

<sup>a</sup> $U(\text{eq})$  is defined as one third of the trace of the orthogonalized  $\mathbf{U}_{ij}$  tensor. The estimated standard deviations of the least significant digits are given in parentheses.



**Table S16.** Bond Lengths for [Fe(OEP)(CO)<sub>2</sub>]<sup>a</sup>

| bond          | length (Å) | bond         | length (Å) |
|---------------|------------|--------------|------------|
| Fe(1)–C(1)#1) | 1.8558(10) | C(11)–C(12)  | 1.5286(14) |
| Fe(1)–C(1)    | 1.8558(10) | C(11)–H(11a) | 0.9900     |
| Fe(1)–N(1)#1) | 2.0126(7)  | C(11)–H(11b) | 0.9900     |
| Fe(1)–N(1)    | 2.0127(7)  | C(12)–H(12a) | 0.9800     |
| Fe(1)–N(2)#1) | 2.0138(7)  | C(12)–H(12b) | 0.9800     |
| Fe(1)–N(2)    | 2.0138(7)  | C(12)–H(12C) | 0.9800     |
| N(1)–C(a2)    | 1.3726(11) | C(21)–C(22)  | 1.5295(14) |
| N(1)–C(a1)    | 1.3754(11) | C(21)–H(21a) | 0.9900     |
| N(2)–C(a3)    | 1.3733(11) | C(21)–H(21b) | 0.9900     |
| N(2)–C(a4)    | 1.3749(10) | C(22)–H(22a) | 0.9800     |
| C(m1)–C(a4#1) | 1.3867(12) | C(22)–H(22b) | 0.9800     |
| C(m1)–C(a1)   | 1.3869(12) | C(22)–H(22C) | 0.9800     |
| C(m1)–H(m1)   | 0.9500     | C(31)–C(32)  | 1.5309(14) |
| C(m2)–C(a3)   | 1.3862(12) | C(31)–H(31a) | 0.9900     |
| C(m2)–C(a2)   | 1.3881(12) | C(31)–H(31b) | 0.9900     |
| C(m2)–H(m2)   | 0.9500     | C(32)–H(32a) | 0.9800     |
| C(a1)–C(b1)   | 1.4526(12) | C(32)–H(32b) | 0.9800     |
| C(a2)–C(b2)   | 1.4489(12) | C(32)–H(32C) | 0.9800     |
| C(a3)–C(b3)   | 1.4544(12) | C(41)–C(42)  | 1.5298(14) |
| C(a4)–C(m1#1) | 1.3867(12) | C(41)–H(41a) | 0.9900     |
| C(a4)–C(b4)   | 1.4478(12) | C(41)–H(41b) | 0.9900     |
| C(b1)–C(b2)   | 1.3637(12) | C(42)–H(42a) | 0.9800     |
| C(b1)–C(11)   | 1.5017(12) | C(42)–H(42b) | 0.9800     |
| C(b2)–C(21)   | 1.4961(13) | C(42)–H(42C) | 0.9800     |
| C(b3)–C(b4)   | 1.3639(12) | C(1)–O(1)    | 1.1216(13) |
| C(b3)–C(31)   | 1.5003(12) |              |            |
| C(b4)–C(41)   | 1.4985(12) |              |            |

<sup>a</sup>The estimated standard deviations of the least significant digits are given in parentheses.

**Table S17.** Bond Angles for [Fe(OEP)(CO)<sub>2</sub>]<sup>a</sup>

| angle               | degree     | angle               | degree    |
|---------------------|------------|---------------------|-----------|
| C(1)#1-Fe(1)-C(1)   | 179.999(3) | C(b1)-C(11)-C(12)   | 113.49(8) |
| C(1)#1-Fe(1)-N(1)#1 | 92.61(4)   | C(b1)-C(11)-H(11a)  | 108.9     |
| C(1)-Fe(1)-N(1)#1   | 87.39(4)   | C(12)-C(11)-H(11a)  | 108.9     |
| C(1)#1-Fe(1)-N(1)   | 87.39(4)   | C(b1)-C(11)-H(11b)  | 108.9     |
| C(1)-Fe(1)-N(1)     | 92.61(4)   | C(12)-C(11)-H(11b)  | 108.9     |
| N(1)#1-Fe(1)-N(1)   | 180.000(2) | H(11a)-C(11)-H(11b) | 107.7     |
| C(1)#1-Fe(1)-N(2)#1 | 86.76(4)   | C(11)-C(12)-H(12a)  | 109.5     |
| C(1)-Fe(1)-N(2)#1   | 93.24(4)   | C(11)-C(12)-H(12b)  | 109.5     |
| N(1)#1-Fe(1)-N(2)#1 | 90.08(3)   | H(12a)-C(12)-H(12b) | 109.5     |
| N(1)-Fe(1)-N(2)#1   | 89.92(3)   | C(11)-C(12)-H(12C)  | 109.5     |
| C(1)#1-Fe(1)-N(2)   | 93.24(4)   | H(12a)-C(12)-H(12C) | 109.5     |
| C(1)-Fe(1)-N(2)     | 86.76(4)   | H(12b)-C(12)-H(12C) | 109.5     |
| N(1)#1-Fe(1)-N(2)   | 89.92(3)   | C(b2)-C(21)-C(22)   | 112.65(8) |
| N(1)-Fe(1)-N(2)     | 90.08(3)   | C(b2)-C(21)-H(21a)  | 109.1     |
| N(2)#1-Fe(1)-N(2)   | 179.999(2) | C(22)-C(21)-H(21a)  | 109.1     |
| C(a2)-N(1)-C(a1)    | 105.60(7)  | C(b2)-C(21)-H(21b)  | 109.1     |
| C(a2)-N(1)-Fe(1)    | 126.83(6)  | C(22)-C(21)-H(21b)  | 109.1     |
| C(a1)-N(1)-Fe(1)    | 127.49(6)  | H(21a)-C(21)-H(21b) | 107.8     |
| C(a3)-N(2)-C(a4)    | 105.73(7)  | C(21)-C(22)-H(22a)  | 109.5     |
| C(a3)-N(2)-Fe(1)    | 127.24(6)  | C(21)-C(22)-H(22b)  | 109.5     |
| C(a4)-N(2)-Fe(1)    | 126.84(6)  | H(22a)-C(22)-H(22b) | 109.5     |
| C(a4#1)-C(m1)-C(a1) | 126.00(8)  | C(21)-C(22)-H(22C)  | 109.5     |
| C(a4#1)-C(m1)-H(m1) | 117.0      | H(22a)-C(22)-H(22C) | 109.5     |
| C(a1)-C(m1)-H(m1)   | 117.0      | H(22b)-C(22)-H(22C) | 109.5     |
| C(a3)-C(m2)-C(a2)   | 126.04(8)  | C(b3)-C(31)-C(32)   | 113.40(8) |
| C(a3)-C(m2)-H(m2)   | 117.0      | C(b3)-C(31)-H(31a)  | 108.9     |
| C(a2)-C(m2)-H(m2)   | 117.0      | C(32)-C(31)-H(31a)  | 108.9     |
| N(1)-C(a1)-C(m1)    | 124.47(8)  | C(b3)-C(31)-H(31b)  | 108.9     |
| N(1)-C(a1)-C(b1)    | 110.72(7)  | C(32)-C(31)-H(31b)  | 108.9     |
| C(m1)-C(a1)-C(b1)   | 124.74(8)  | H(31a)-C(31)-H(31b) | 107.7     |
| N(1)-C(a2)-C(m2)    | 125.08(8)  | C(31)-C(32)-H(32a)  | 109.5     |
| N(1)-C(a2)-C(b2)    | 110.64(7)  | C(31)-C(32)-H(32b)  | 109.5     |
| C(m2)-C(a2)-C(b2)   | 124.28(8)  | H(32a)-C(32)-H(32b) | 109.5     |
| N(2)-C(a3)-C(m2)    | 124.56(8)  | C(31)-C(32)-H(32C)  | 109.5     |

**Table S17.** Continued

| angle               | degree    | angle               | degree    |
|---------------------|-----------|---------------------|-----------|
| N(2)–C(a3)–C(b3)    | 110.66(7) | H(32a)–C(32)–H(32C) | 109.5     |
| C(m2)–C(a3)–C(b3)   | 124.77(8) | H(32b)–C(32)–H(32C) | 109.5     |
| N(2)–C(a4)–C(m1#1)  | 125.11(8) | C(b4)–C(41)–C(42)   | 113.32(8) |
| N(2)–C(a4)–C(b4)    | 110.50(7) | C(b4)–C(41)–H(41a)  | 108.9     |
| C(m1#1)–C(a4)–C(b4) | 124.39(8) | C(42)–C(41)–H(41a)  | 108.9     |
| C(b2)–C(b1)–C(a1)   | 106.24(7) | C(b4)–C(41)–H(41b)  | 108.9     |
| C(b2)–C(b1)–C(11)   | 127.42(8) | C(42)–C(41)–H(41b)  | 108.9     |
| C(a1)–C(b1)–C(11)   | 126.34(8) | H(41a)–C(41)–H(41b) | 107.7     |
| C(b1)–C(b2)–C(a2)   | 106.80(8) | C(41)–C(42)–H(42a)  | 109.5     |
| C(b1)–C(b2)–C(21)   | 128.03(8) | C(41)–C(42)–H(42b)  | 109.5     |
| C(a2)–C(b2)–C(21)   | 125.17(8) | H(42a)–C(42)–H(42b) | 109.5     |
| C(b4)–C(b3)–C(a3)   | 106.20(7) | C(41)–C(42)–H(42C)  | 109.5     |
| C(b4)–C(b3)–C(31)   | 127.39(8) | H(42a)–C(42)–H(42C) | 109.5     |
| C(a3)–C(b3)–C(31)   | 126.41(8) | H(42b)–C(42)–H(42C) | 109.5     |
| C(b3)–C(b4)–C(a4)   | 106.91(7) | O(1)–C(1)–Fe(1)     | 173.95(9) |
| C(b3)–C(b4)–C(41)   | 127.86(8) |                     |           |
| C(a4)–C(b4)–C(41)   | 125.22(8) |                     |           |

<sup>a</sup>The estimated standard deviations of the least significant digits are given in parentheses.

**Table S18.** Anisotropic Displacement Parameters ( $\text{\AA}^2$ ) for  $[\text{Fe}(\text{OEP})(\text{CO})_2]^a$ 

| atom  | $U_{11}$  | $U_{22}$  | $U_{33}$  | $U_{23}$   | $U_{13}$   | $U_{12}$   |
|-------|-----------|-----------|-----------|------------|------------|------------|
| Fe(1) | 0.0102(1) | 0.0073(1) | 0.0072(1) | -0.0009(1) | -0.0018(1) | -0.0018(1) |
| N(1)  | 0.0124(3) | 0.0085(3) | 0.0087(3) | -0.0008(2) | -0.0026(2) | -0.0024(2) |
| N(2)  | 0.0124(3) | 0.0085(3) | 0.0085(3) | -0.0009(2) | -0.0022(2) | -0.0023(2) |
| C(M1) | 0.0142(3) | 0.0092(3) | 0.0101(3) | -0.0020(3) | -0.0028(3) | -0.0022(3) |
| C(M2) | 0.0153(3) | 0.0100(3) | 0.0092(3) | 0.0005(3)  | -0.0027(3) | -0.0037(3) |
| C(A1) | 0.0119(3) | 0.0087(3) | 0.0103(3) | -0.0013(3) | -0.0030(3) | -0.0023(3) |
| C(A2) | 0.0134(3) | 0.0090(3) | 0.0095(3) | -0.0002(3) | -0.0030(3) | -0.0034(3) |
| C(A3) | 0.0124(3) | 0.0102(3) | 0.0088(3) | -0.0006(3) | -0.0025(3) | -0.0029(3) |
| C(A4) | 0.0120(3) | 0.0096(3) | 0.0091(3) | -0.0019(3) | -0.0025(3) | -0.0024(3) |
| C(B1) | 0.0129(3) | 0.0083(3) | 0.0118(4) | -0.0007(3) | -0.0037(3) | -0.0025(3) |
| C(B2) | 0.0140(3) | 0.0084(3) | 0.0108(3) | 0.0001(3)  | -0.0036(3) | -0.0035(3) |
| C(B3) | 0.0118(3) | 0.0113(3) | 0.0086(3) | -0.0008(3) | -0.0024(3) | -0.0030(3) |
| C(B4) | 0.0125(3) | 0.0114(3) | 0.0083(3) | -0.0018(3) | -0.0025(3) | -0.0028(3) |
| C(11) | 0.0161(4) | 0.0088(3) | 0.0138(4) | -0.0020(3) | -0.0035(3) | -0.0027(3) |
| C(12) | 0.0173(4) | 0.0178(4) | 0.0241(5) | -0.0062(4) | -0.0060(4) | 0.0007(3)  |
| C(21) | 0.0212(4) | 0.0107(3) | 0.0127(4) | 0.0018(3)  | -0.0048(3) | -0.0068(3) |
| C(22) | 0.0282(5) | 0.0158(4) | 0.0151(4) | 0.0041(3)  | -0.0107(4) | -0.0082(4) |
| C(31) | 0.0171(4) | 0.0138(4) | 0.0089(3) | 0.0007(3)  | -0.0038(3) | -0.0046(3) |
| C(32) | 0.0187(4) | 0.0211(5) | 0.0182(4) | 0.0047(4)  | -0.0017(4) | -0.0065(4) |
| C(41) | 0.0195(4) | 0.0130(4) | 0.0101(4) | -0.0032(3) | -0.0043(3) | -0.0030(3) |
| C(42) | 0.0197(4) | 0.0164(4) | 0.0172(4) | -0.0046(3) | -0.0012(3) | 0.0001(3)  |
| C(1)  | 0.0154(4) | 0.0129(4) | 0.0145(4) | -0.0012(3) | -0.0034(3) | -0.0026(3) |
| O(1)  | 0.0206(4) | 0.0365(5) | 0.0440(5) | -0.0038(4) | -0.0141(4) | -0.0096(4) |

<sup>a</sup>The estimated standard deviations of the least significant digits are given in parentheses. The anisotropic displacement factor exponent takes the form:  $-2 \pi [\text{h}^2 U_{11} + \dots + 2 \text{h k a}^* \text{b}^* U_{12}]$ .

**Table S19.** Hydrogen Atom Coordinates and Equivalent Isotropic Displacement Parameters ( $\text{\AA}^2$ ) for  $[\text{Fe}(\text{OEP})(\text{CO})_2]^a$

| atom   | $x$     | $y$     | $z$    | $U(\text{eq})$ |
|--------|---------|---------|--------|----------------|
| H(M1)  | 0.7599  | 0.1248  | 0.2466 | 0.014          |
| H(M2)  | 0.4351  | 0.2365  | 0.8756 | 0.015          |
| H(11A) | 0.7442  | -0.0819 | 0.3563 | 0.016          |
| H(11B) | 0.7002  | -0.1583 | 0.5056 | 0.016          |
| H(12A) | 1.0080  | -0.2428 | 0.3760 | 0.032          |
| H(12B) | 0.9753  | -0.1661 | 0.5115 | 0.032          |
| H(12C) | 1.0192  | -0.0873 | 0.3633 | 0.032          |
| H(21A) | 0.5910  | -0.1197 | 0.7379 | 0.018          |
| H(21B) | 0.4587  | 0.0049  | 0.8435 | 0.018          |
| H(22A) | 0.6971  | -0.1205 | 0.9171 | 0.028          |
| H(22B) | 0.7078  | 0.0344  | 0.8701 | 0.028          |
| H(22C) | 0.8365  | -0.0948 | 0.7692 | 0.028          |
| H(31A) | 0.3142  | 0.4848  | 1.1426 | 0.016          |
| H(31B) | 0.3712  | 0.3374  | 1.0727 | 0.016          |
| H(32A) | 0.0907  | 0.3767  | 1.2506 | 0.032          |
| H(32B) | 0.0688  | 0.3774  | 1.1051 | 0.032          |
| H(32C) | 0.0133  | 0.5226  | 1.1786 | 0.032          |
| H(41A) | 0.2490  | 0.8376  | 0.9755 | 0.018          |
| H(41B) | 0.2208  | 0.7272  | 1.1022 | 0.018          |
| H(42A) | -0.0510 | 0.9081  | 1.1219 | 0.031          |
| H(42B) | -0.0664 | 0.7594  | 1.1064 | 0.031          |
| H(42C) | -0.0382 | 0.8657  | 0.9758 | 0.031          |

<sup>a</sup> $U(\text{eq})$  is defined as one third of the trace of the orthogonalized  $\mathbf{U}_{ij}$  tensor the estimated standard deviations of the least significant digits are given in parentheses.

## Supporting Information

Figure 1. Thermal ellipsoid plot of  $[\text{Fe}(\text{OEP})(\text{CO})]\cdot\text{C}_6\text{H}_6$ .

Figure 2. Formal diagrams of the porphyrinato core of  $[\text{Fe}(\text{OEP})(\text{CO})]$  (a),  $[\text{Fe}(\text{OEP})(\text{CO})]\cdot\text{C}_6\text{H}_6$  (b), and  $[\text{Fe}(\text{OEP})(\text{CO})_2]$  (c) displaying the perpendicular displacements (in units of 0.01 Å) of the core atoms from the 24-atom mean plane. Positive displacements are toward the CO-coordinated face.

Table S1. Mössbauer data for  $[\text{Fe}(\text{OEP})(\text{CO})]$  and related complexes.

Table S2. Complete Crystallographic Details for  $[\text{Fe}(\text{OEP})(\text{CO})]$ .

Table S3. Atomic Coordinates and Equivalent Isotropic Displacement Parameters for  $[\text{Fe}(\text{OEP})(\text{CO})]$ .

Table S4. Bond Lengths for  $[\text{Fe}(\text{OEP})(\text{CO})]$ .

Table S5. Bond Angles for  $[\text{Fe}(\text{OEP})(\text{CO})]$ .

Table S6. Anisotropic Isotropic Displacement Parameters for  $[\text{Fe}(\text{OEP})(\text{CO})]$ .

Table S7. Hydrogen Coordinates and Isotropic Displacement Parameters for  $[\text{Fe}(\text{OEP})(\text{CO})]$ .

Table S8. Complete Crystallographic Details for  $[\text{Fe}(\text{OEP})(\text{CO})]\cdot\text{C}_6\text{H}_6$ .

Table S9. Atomic Coordinates and Equivalent Isotropic Displacement Parameters for  $[\text{Fe}(\text{OEP})(\text{CO})]\cdot\text{C}_6\text{H}_6$ .

Table S10. Bond Lengths for  $[\text{Fe}(\text{OEP})(\text{CO})]\cdot\text{C}_6\text{H}_6$ .

Table S11. Bond Angles for  $[\text{Fe}(\text{OEP})(\text{CO})]\cdot\text{C}_6\text{H}_6$ .

Table S12. Anisotropic Isotropic Displacement Parameters for  $[\text{Fe}(\text{OEP})(\text{CO})]\cdot\text{C}_6\text{H}_6$ .

Table S13. Hydrogen Coordinates and Isotropic Displacement Parameters for  $[\text{Fe}(\text{OEP})(\text{CO})]\cdot\text{C}_6\text{H}_6$ .

Table S14. Complete Crystallographic Details for  $[\text{Fe}(\text{OEP})(\text{CO})_2]$ .

Table S15. Atomic Coordinates and Equivalent Isotropic Displacement Parameters for  $[\text{Fe}(\text{OEP})(\text{CO})_2]$ .

Table S16. Bond Lengths for  $[\text{Fe}(\text{OEP})(\text{CO})_2]$ .

Table S17. Bond Angles for  $[\text{Fe}(\text{OEP})(\text{CO})_2]$ .

Table S18. Anisotropic Isotropic Displacement Parameters for  $[\text{Fe}(\text{OEP})(\text{CO})_2]$ .

Table S19. Hydrogen Coordinates and Isotropic Displacement Parameters for  $[\text{Fe}(\text{OEP})(\text{CO})_2]$ .
